# Supplementary material for: Synthesis and spectral characterization of bimetallic metallomacrocyclic structures [MII2-μ2-bis-{(κ2S,S-S2CN(R)C6H4)2O}] (M = Ni/Zn/Cd): density functional theory and host–guest reactivity studies
Source: Royal Society of Chemistry journal article supplement (doi:10.1039/c5ra22175g), 2015-01-01
Supplement: c5ra22175g1.pdf [file c5ra22175g1.pdf]

## Synthesis and Spectral Characterization of Bimetallic Metallomacrocyclic Structures

### [M<sup>II</sup><sub>2</sub>-μ<sup>2</sup>-bis-{(κ<sup>2</sup>S,S-S<sub>2</sub>CN(R)C<sub>6</sub>H<sub>4</sub>)<sub>2</sub>O}] (M= Ni/Zn/Cd): Density Functional Theory and Host-Guest Reactivity Studies

Rahul Kadu, Vineeta Pillai, Amrit V. and Vinay K. Singh\*

Department of Chemistry, Faculty of Science, The M. S. University of Baroda,

Vadodara-390 002, India;

\*Email: [vks.msu@gmail.com](mailto:vks.msu@gmail.com); [vinay.singh-chem@msubaroda.ac.in](mailto:vinay.singh-chem@msubaroda.ac.in)

### Electronic Supplementary Information

#### Contents

- I. Spectral Characterization (ESI-MS, IR, NMR-<sup>1</sup>H, <sup>13</sup>C, <sup>1</sup>H DOSY) [Page S2-S16]
- II. Optical Properties [Page S16-S18]
- III. Thermogravimetric Study [Page S19-S21]
- IV. Host-Guest Interaction [Page S21-S24]
- V. Computational Investigations [Page S24-S41]

# I. Spectral Characterization

## 1. Mass Spectra:

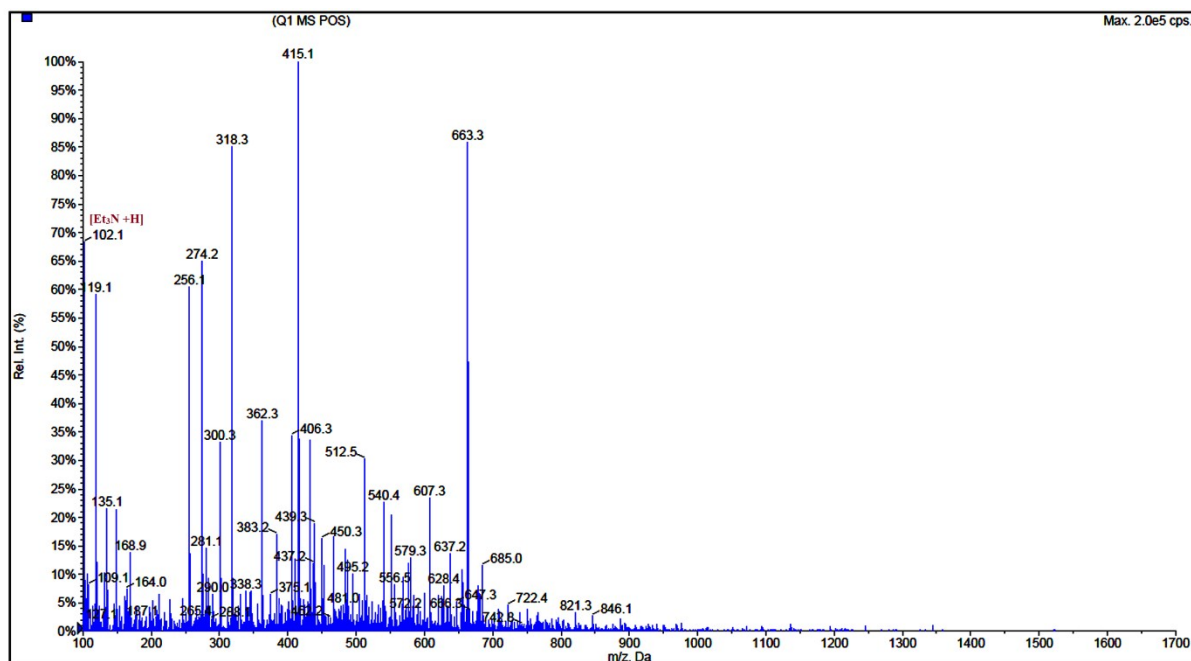

Fig. S1 Mass spectrum (positive ion mode) of complex 1.

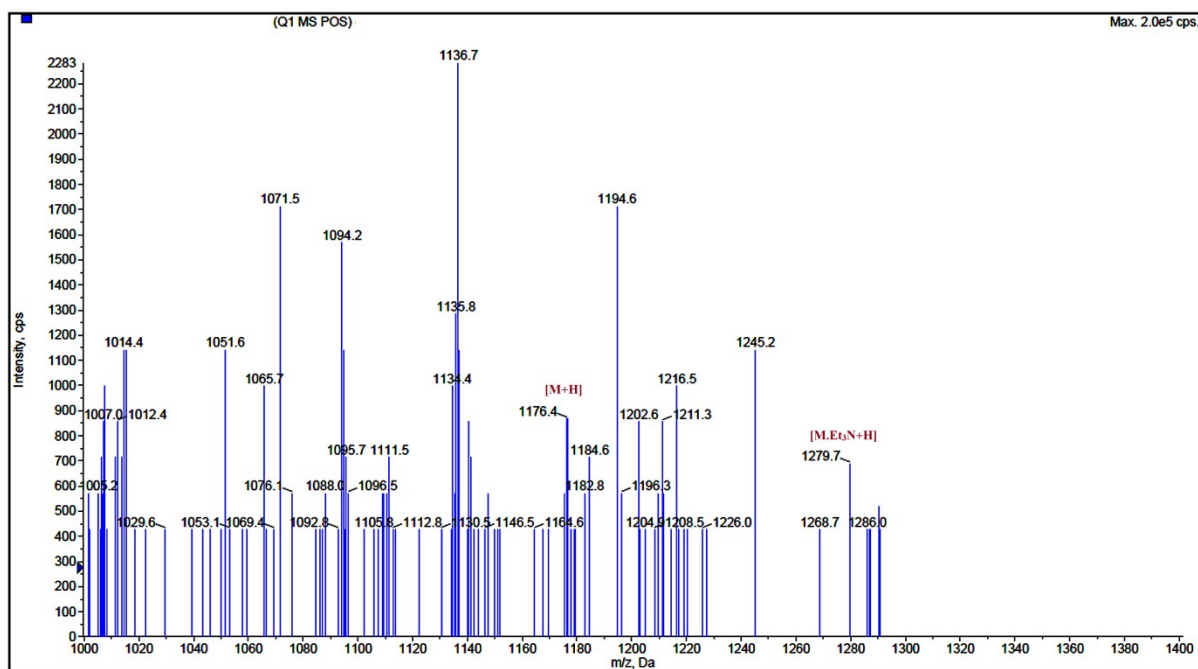

Fig. S2 Mass spectrum (positive ion mode) of complex 1.

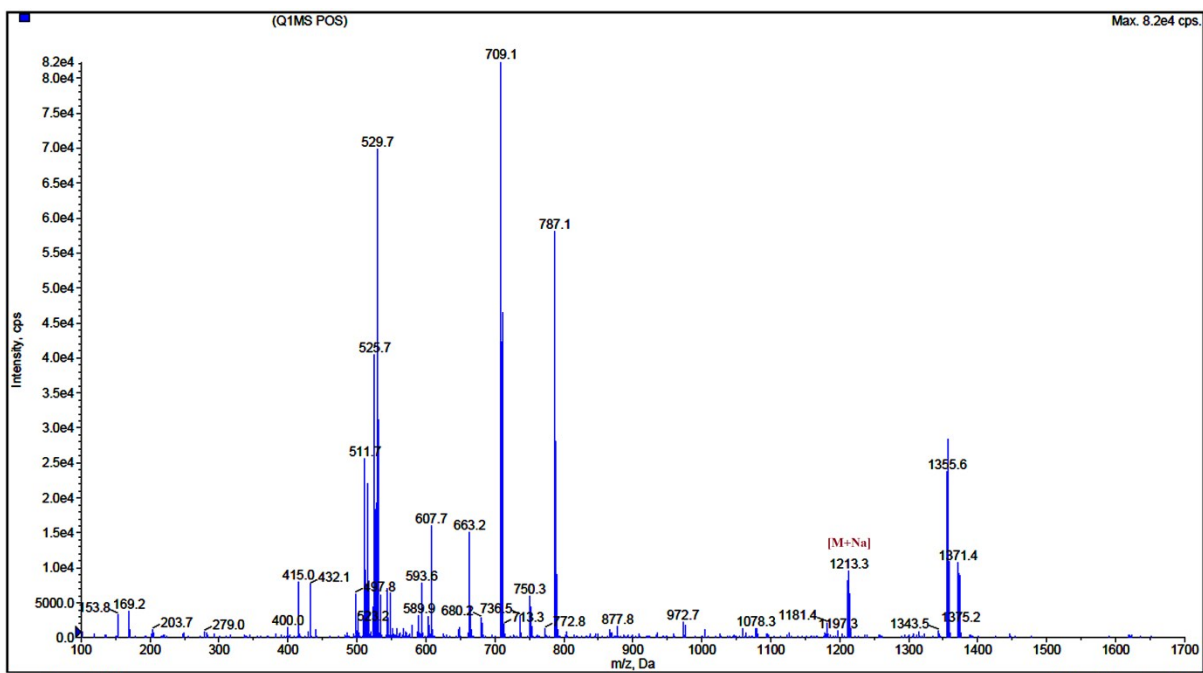

Fig. S3 Mass spectrum (positive ion mode) of complex 2.

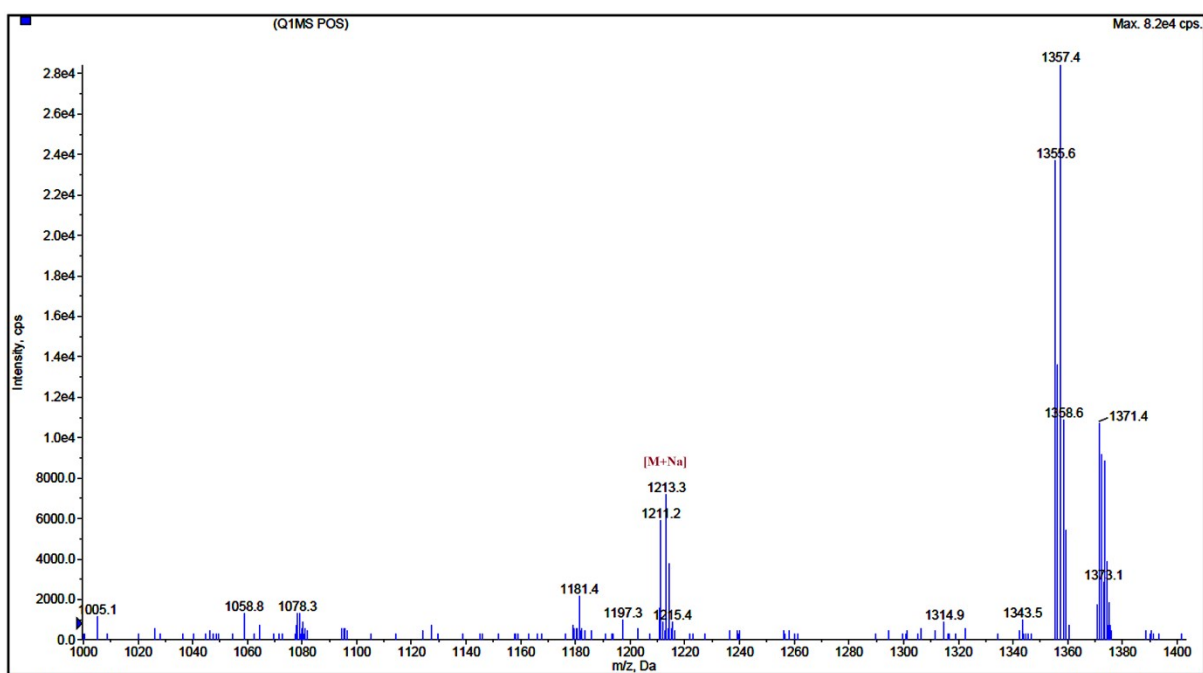

Fig. S4 Mass spectrum (positive ion mode) of complex 2.

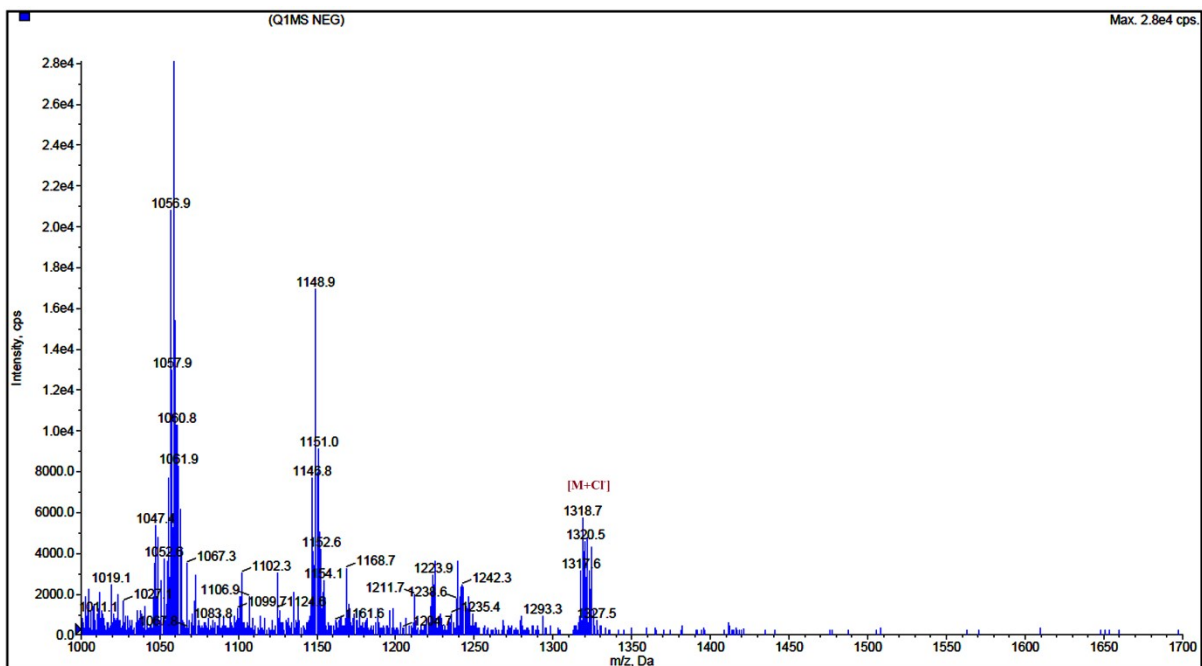

Fig. S5 Mass spectrum (negative ion mode) of complex 3.

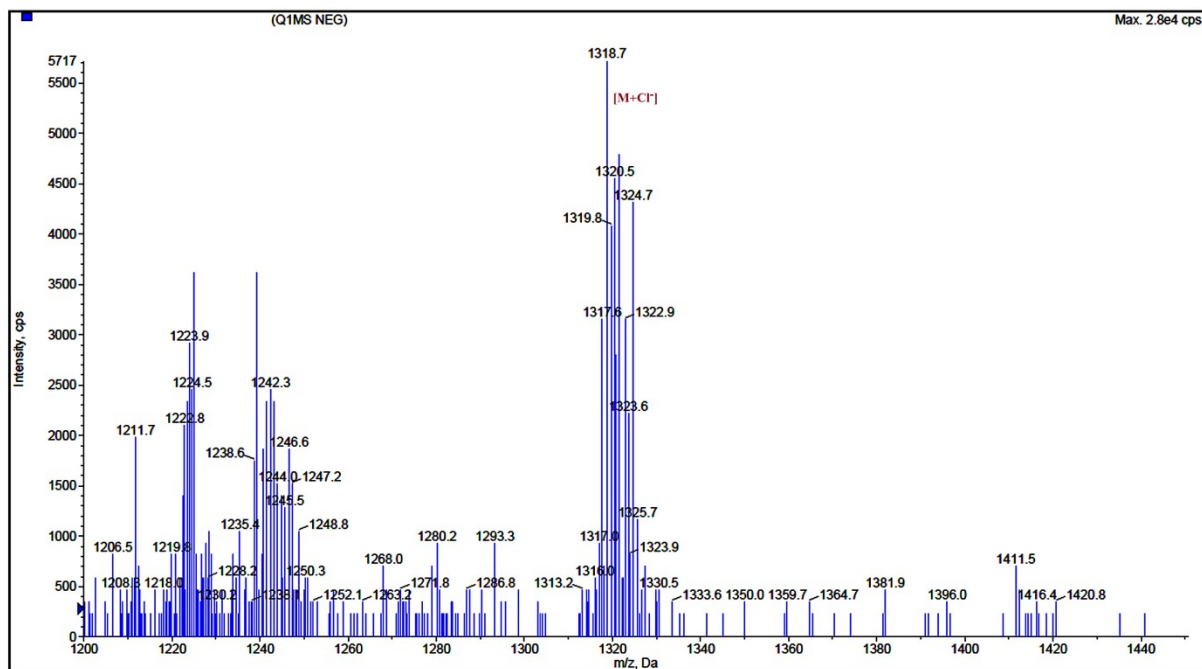

Fig.S6 Mass spectrum (negative ion mode) of complex 3.

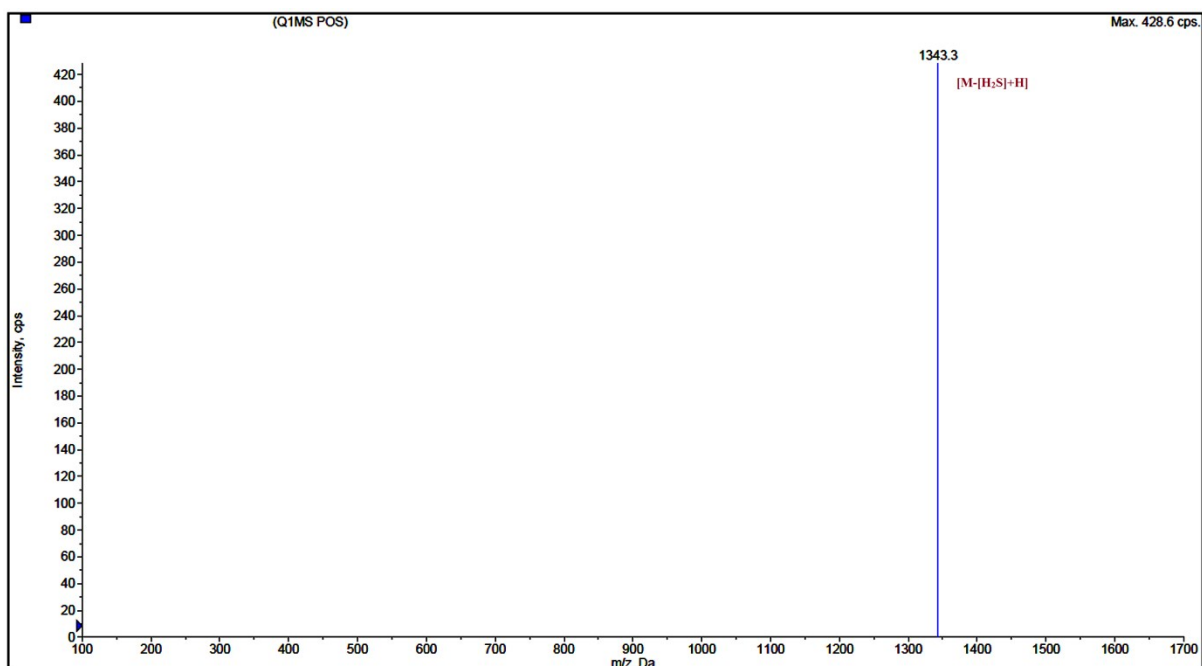

Fig.S7 Mass spectrum (positive ion mode) of complex 4.

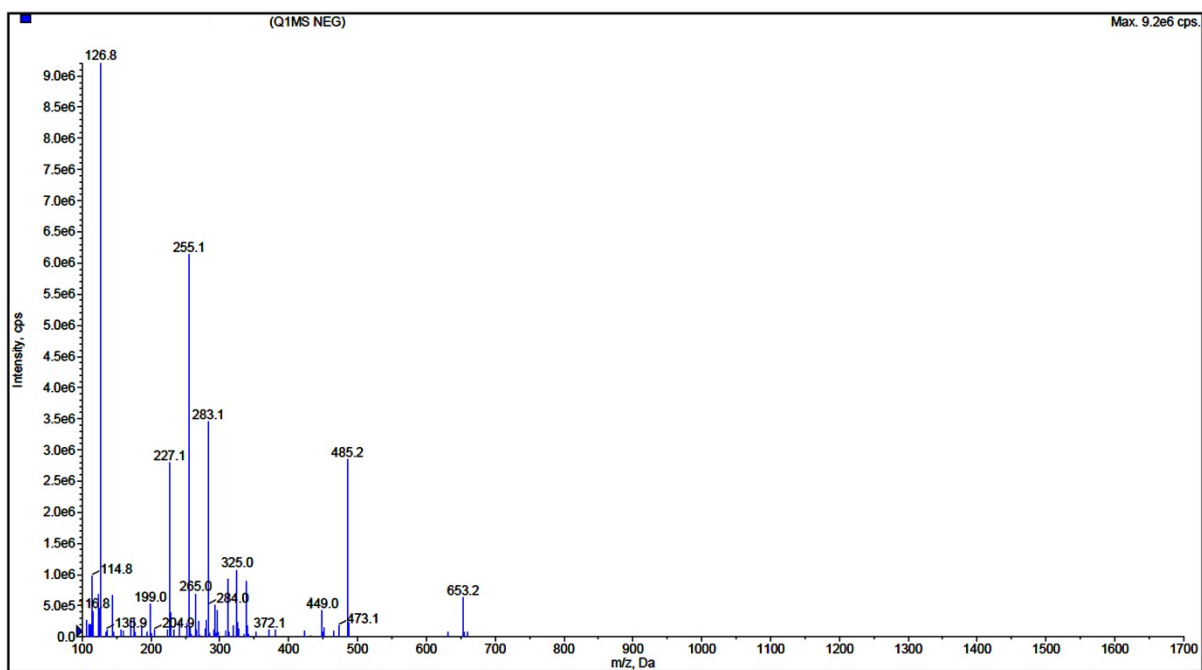

Fig. S8 Mass spectrum (negative ion mode) of complex 4.

Table S1 Mass Analysis of binuclear M<sup>II</sup>dithiocarbamate complexes (1-4)

| m/z    | Possible fragments                             |
|--------|------------------------------------------------|
|        | <b>Complex 1 (1175.99)</b>                     |
| 1279.7 | [M.Et <sub>3</sub> N+H]                        |
| 1194.6 | [M+19] (19: NH <sub>4</sub> /H <sub>3</sub> O) |
| 1176.4 | [M+H]                                          |
| 663.3  |                                                |

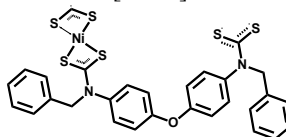

512.5

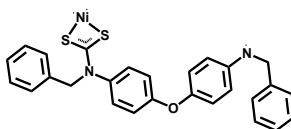

391.91

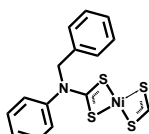

415.91

[391.91 + 23]

102.1

[Et<sub>3</sub>N+H]

**Complex 2 (1187.98)**

1356.58

[M + diphenylether]

1213.3

[M+Na]

709.1

[699.05 + 3Li+H]

699.05

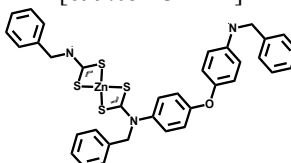

593.6

Symmetrical cleavage

102.1

No peak for Et<sub>3</sub>N

**Complex 3 (1287.93) (negative ion mode)**

1320.5

1285.93 + Cl<sup>-</sup>

1148.9

[1058+benz+H<sup>-</sup>]

1022.14

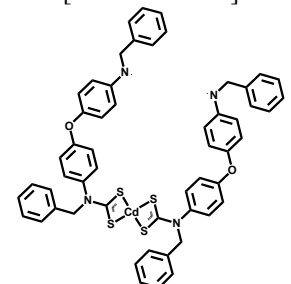

1058

[1022.14 + Cl<sup>-</sup>]

OR

[M-(Cd+2CS<sub>2</sub>)+Cl<sup>-</sup>]

**Complex 4 (1376.06)**

1343.3

[(M-S) + H]

653.2

[630.09 + 23]

630.09

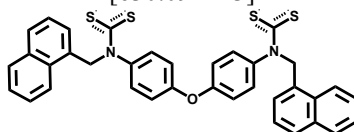

485.2

[478.20 + 2Li+ H<sup>-</sup>]

478.20

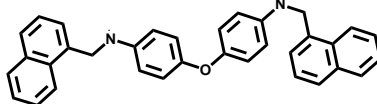

255.1

[254.02 + H<sup>-</sup>]

254.02

[231.02 + 23]

231.02

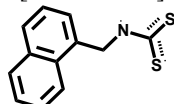

126.8

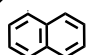

## 2. IR spectra

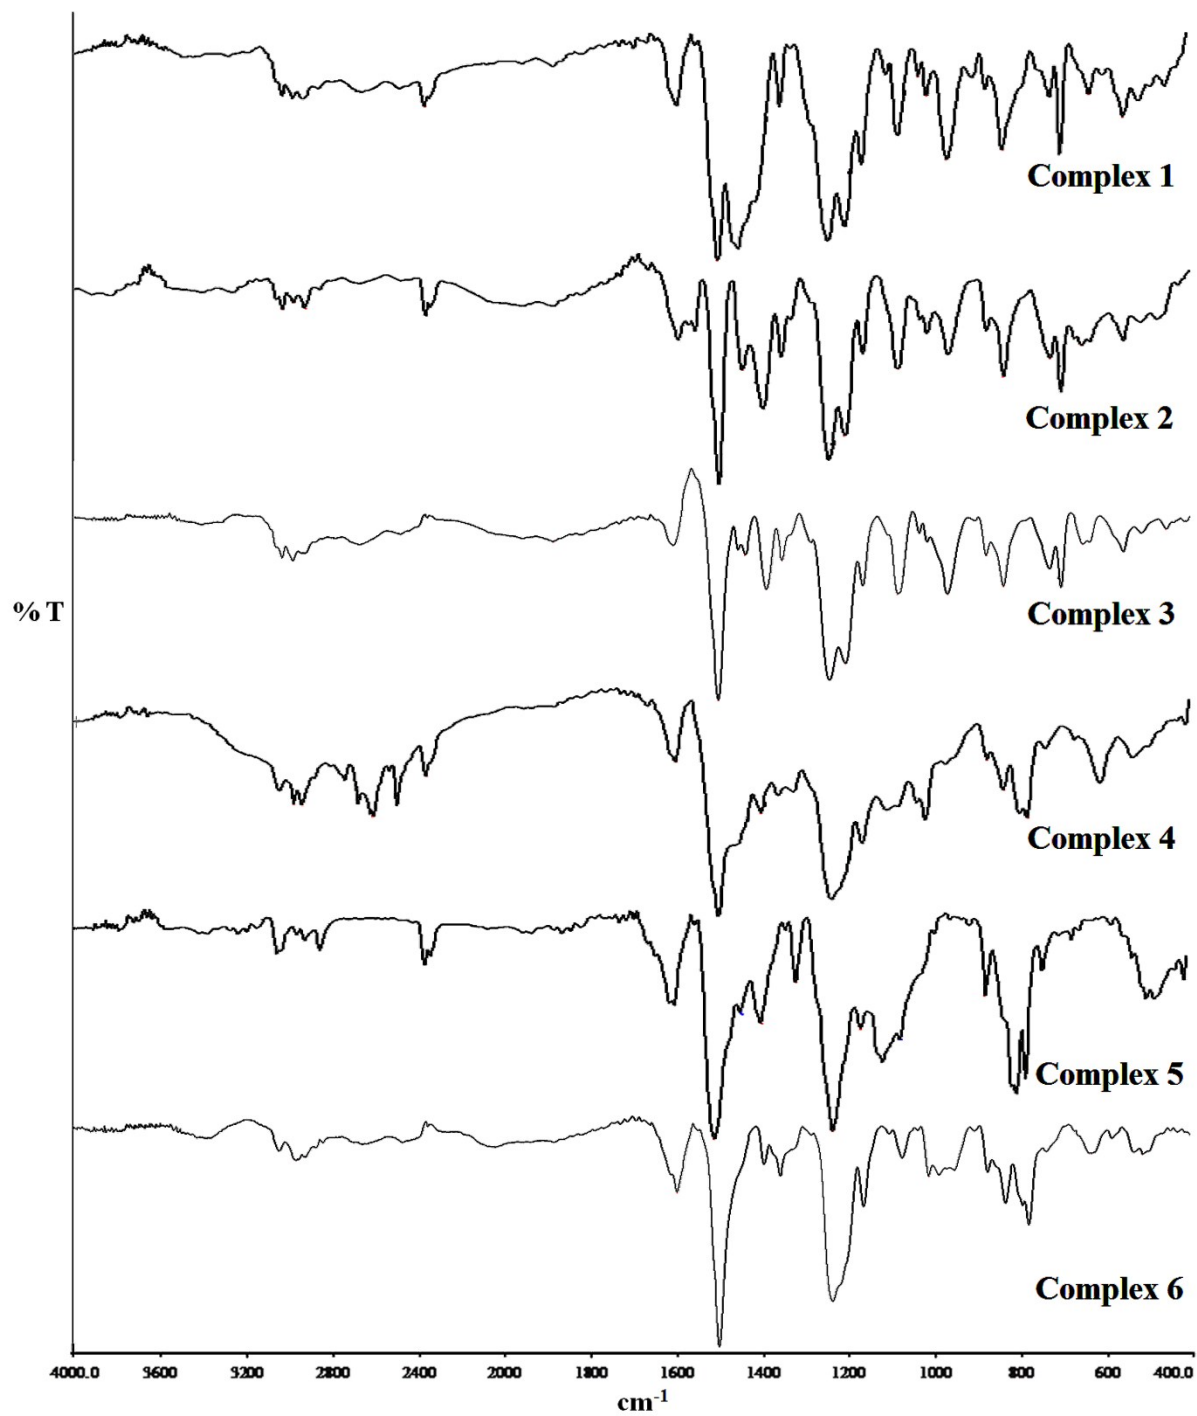

Fig. S9 IR spectra of complex 1-6.

### 3. NMR spectra

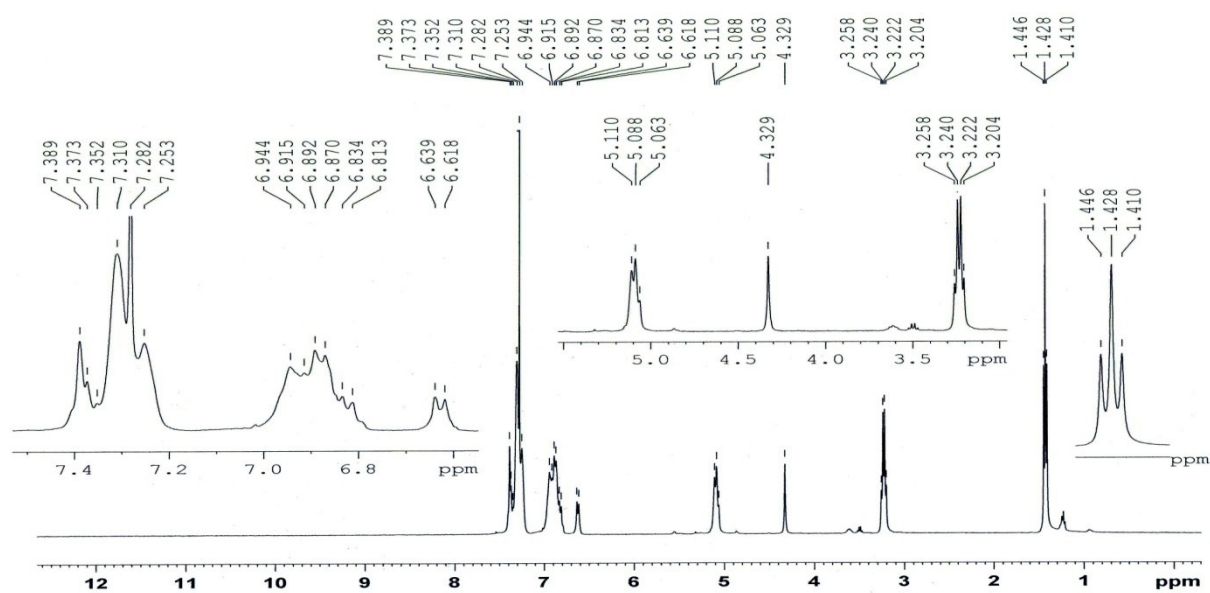

Fig. S10 <sup>1</sup>H NMR spectrum of complex 1.

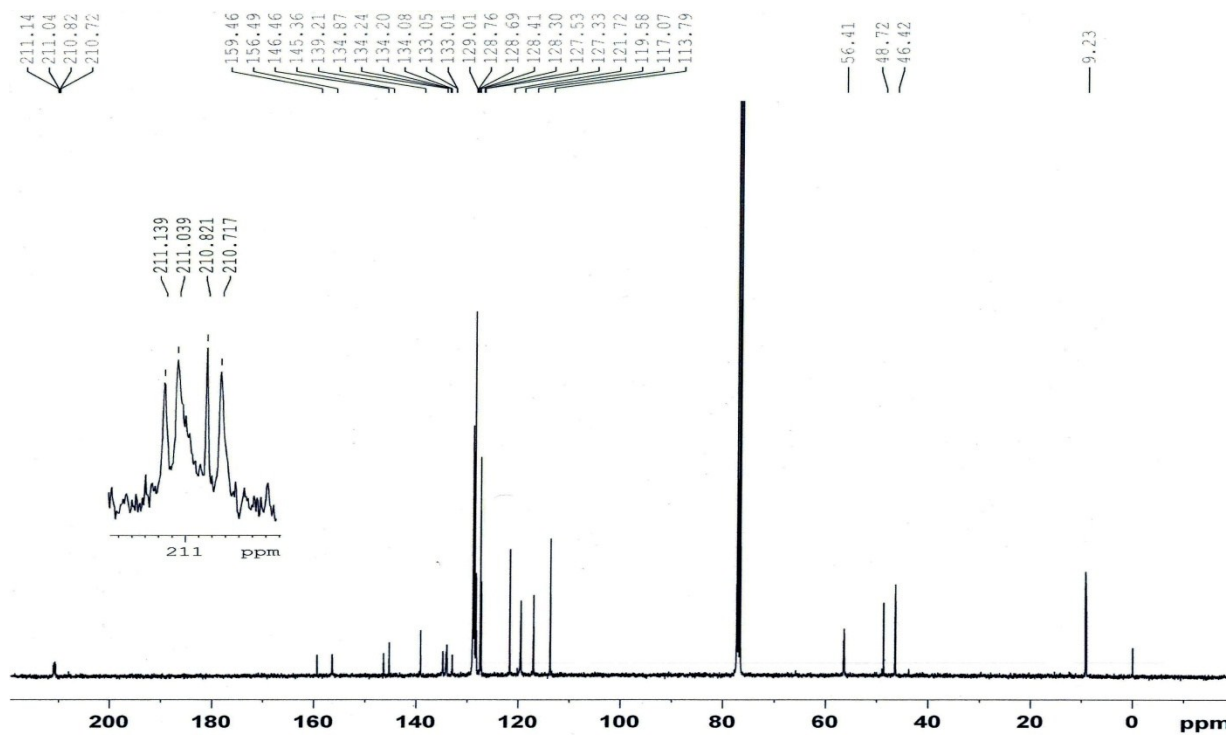

Fig. S11 <sup>13</sup>C NMR spectrum of complex 1.



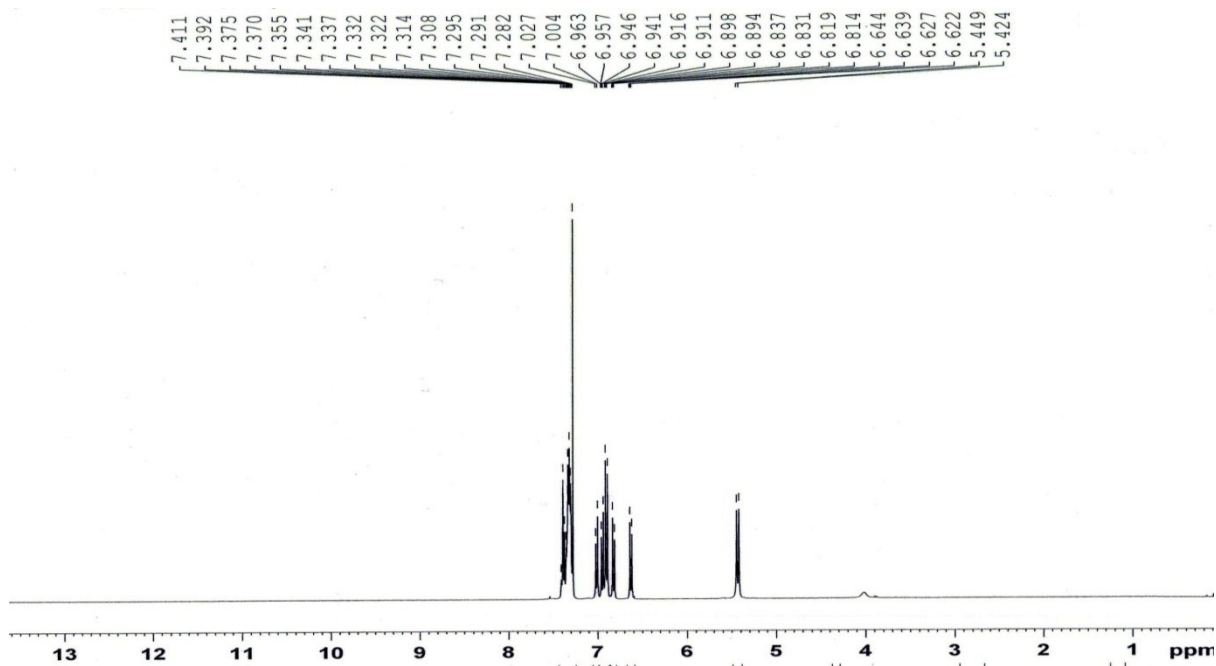

Fig. S12  $^1\text{H}$  NMR spectrum of complex 2.

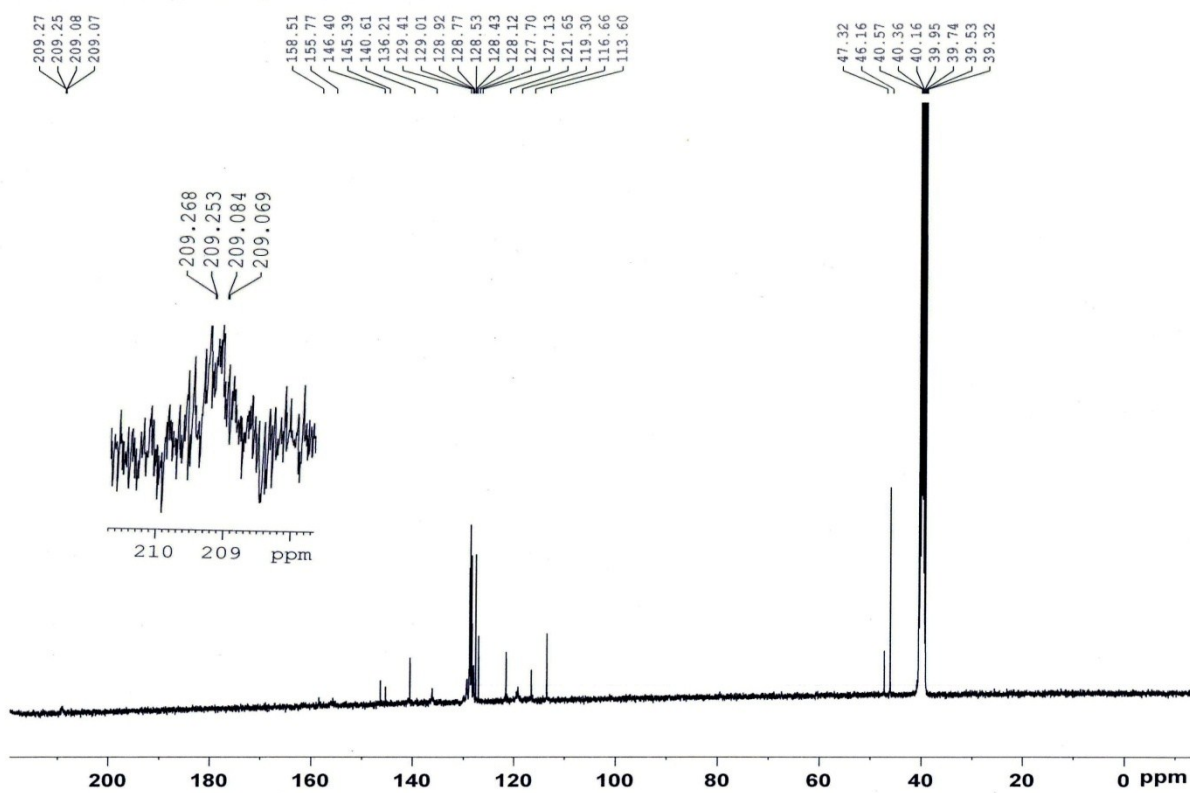

Fig. S13  $^{13}\text{C}$  NMR spectrum of complex 2.

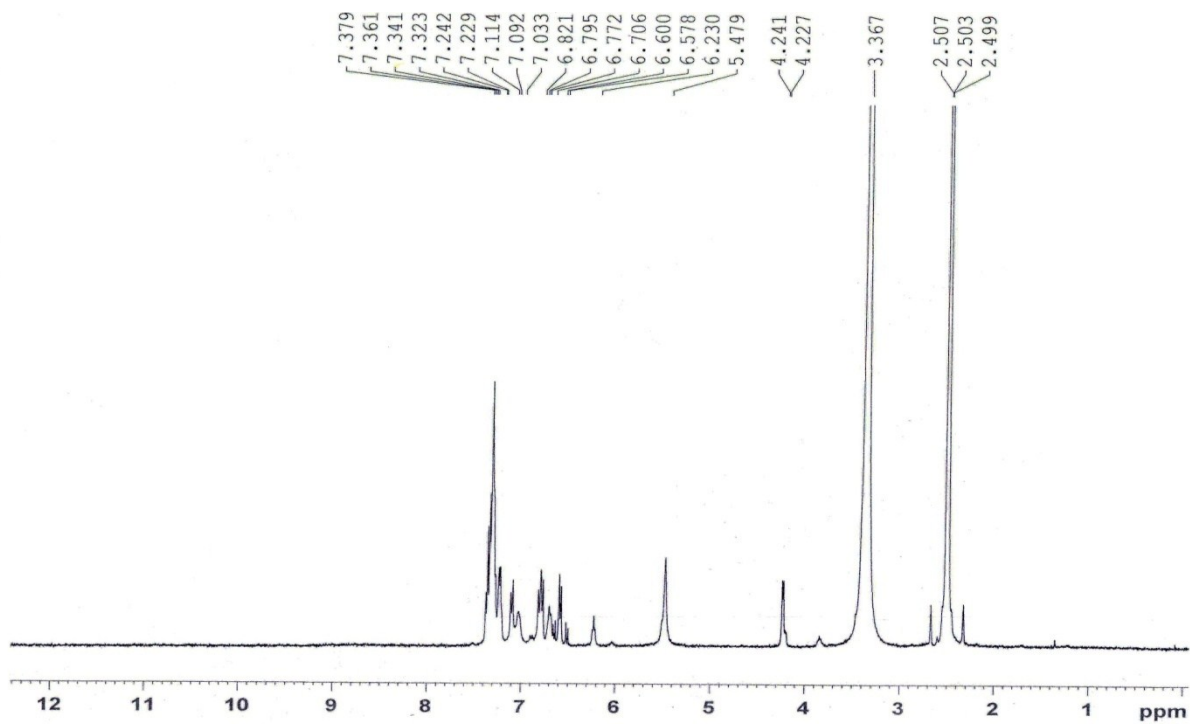

Fig. S14  $^1\text{H}$  NMR spectrum of complex 3.

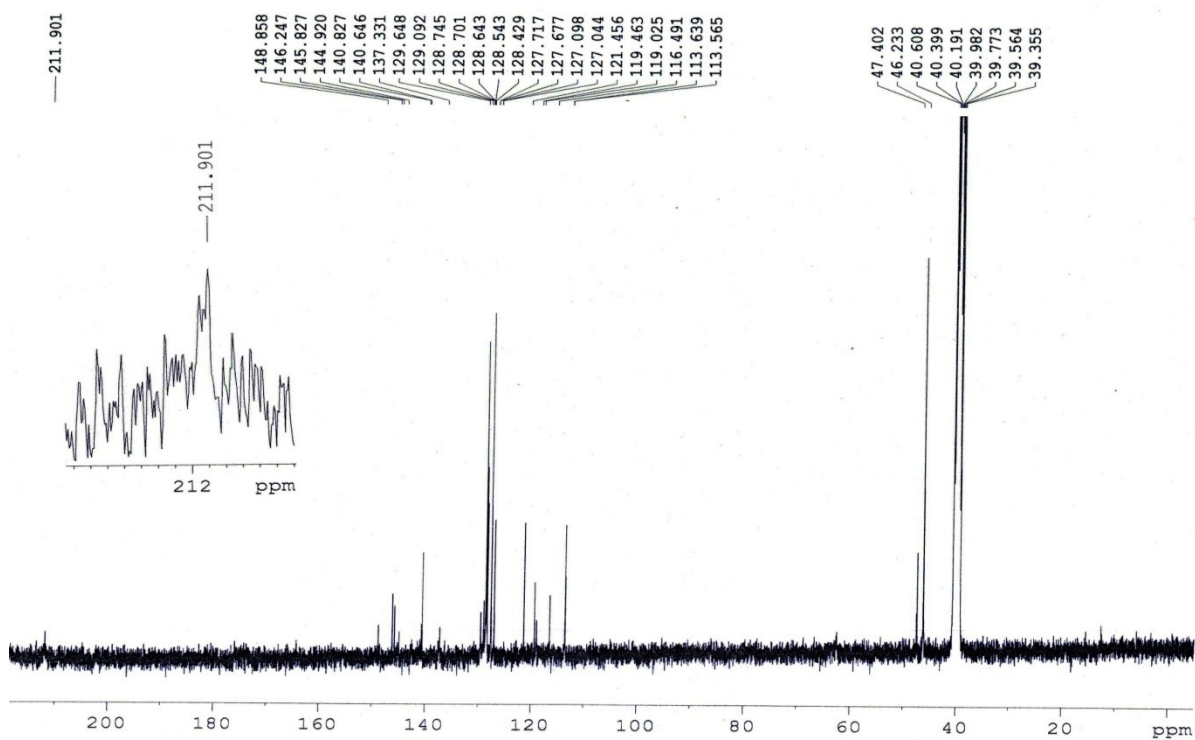

Fig. S15  $^{13}\text{C}$  NMR spectrum of complex 3.

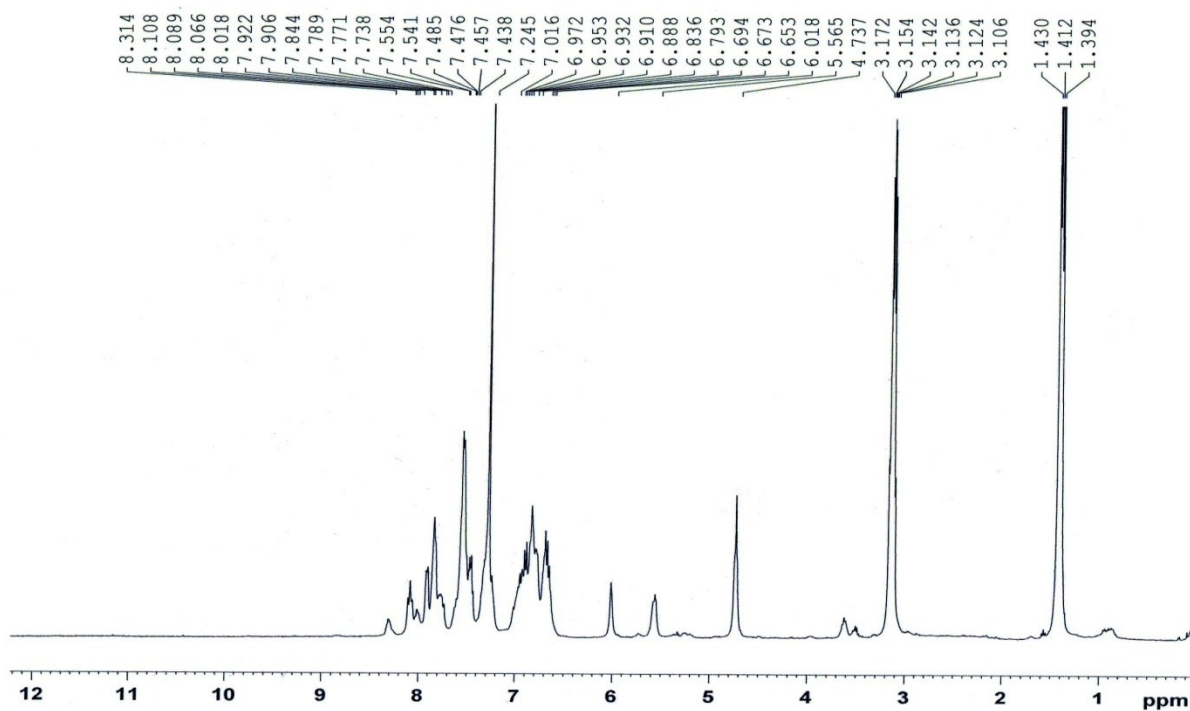

Fig. S16  $^1\text{H}$  NMR spectrum of complex 4.

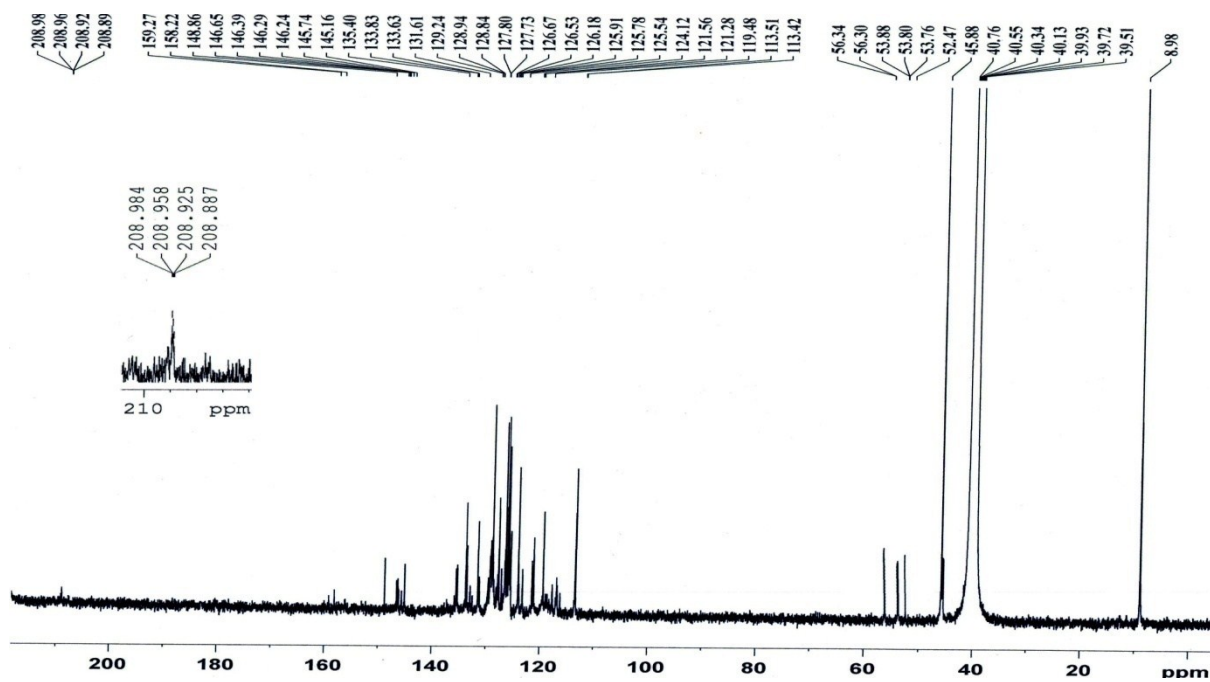

Fig. S17  $^{13}\text{C}$  NMR spectrum of complex 4.

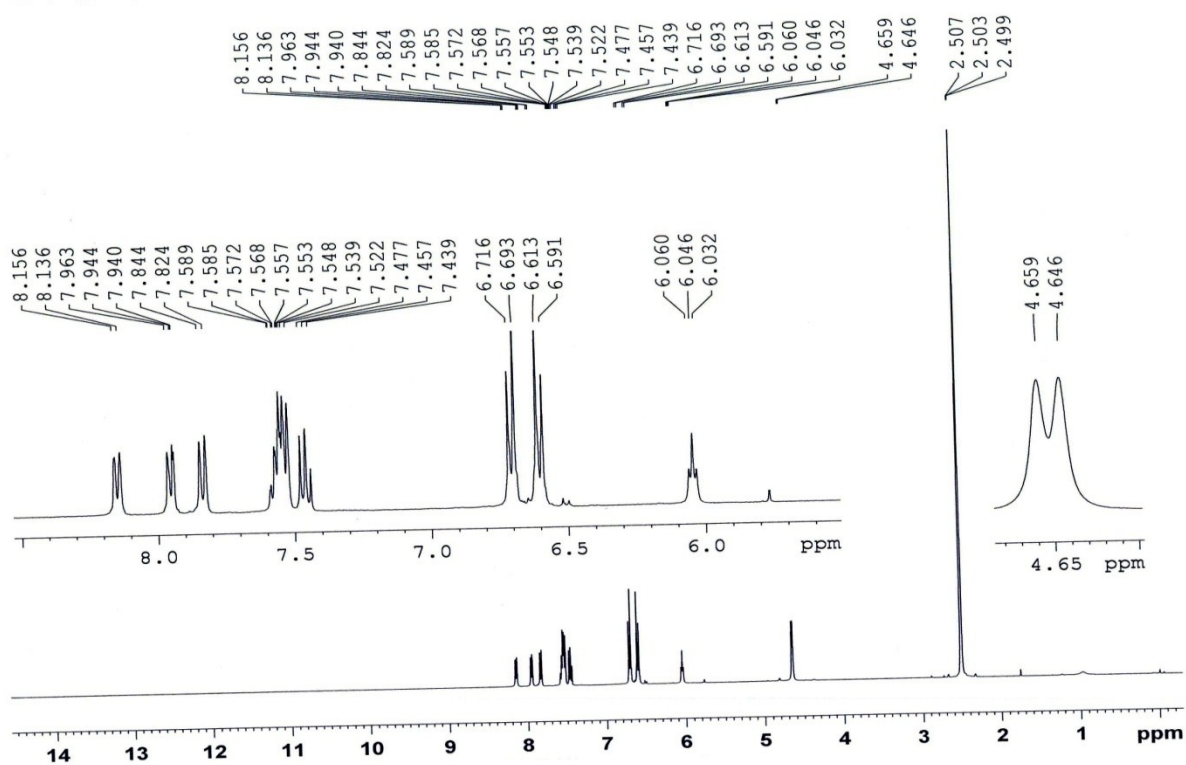

Fig. S18  $^1\text{H}$  NMR spectrum of complex 5.

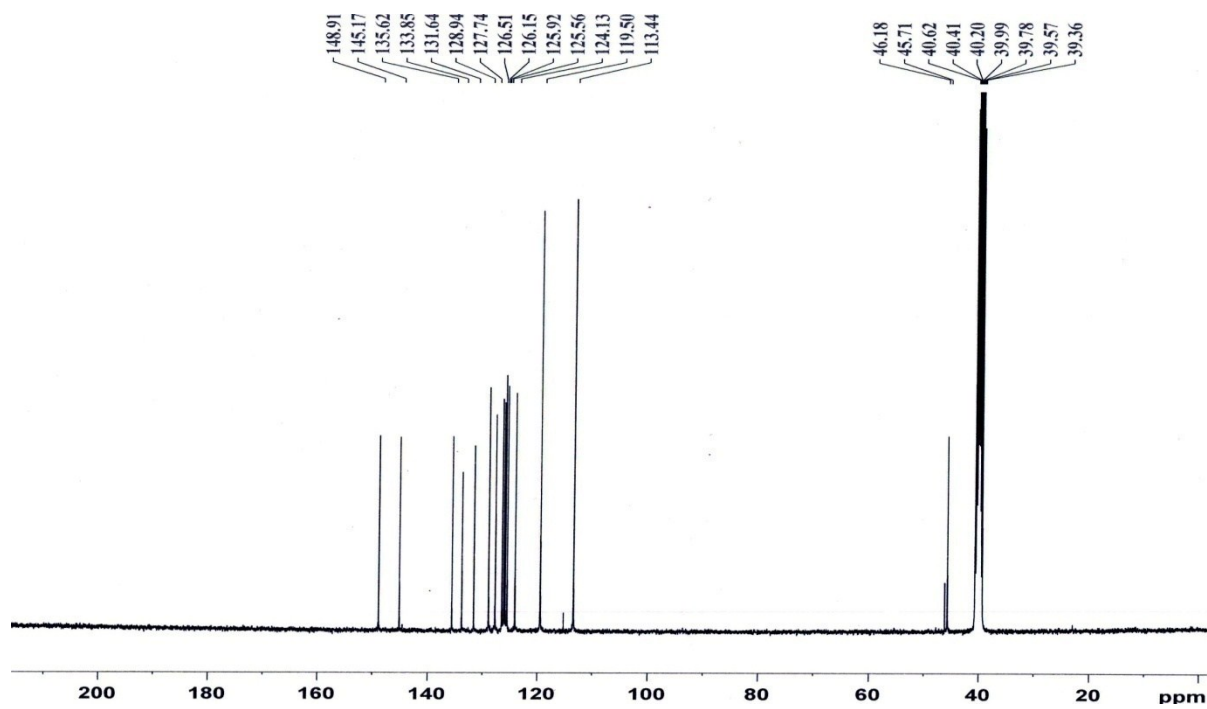

Fig. S19  $^{13}\text{C}$  NMR spectrum of complex 5.

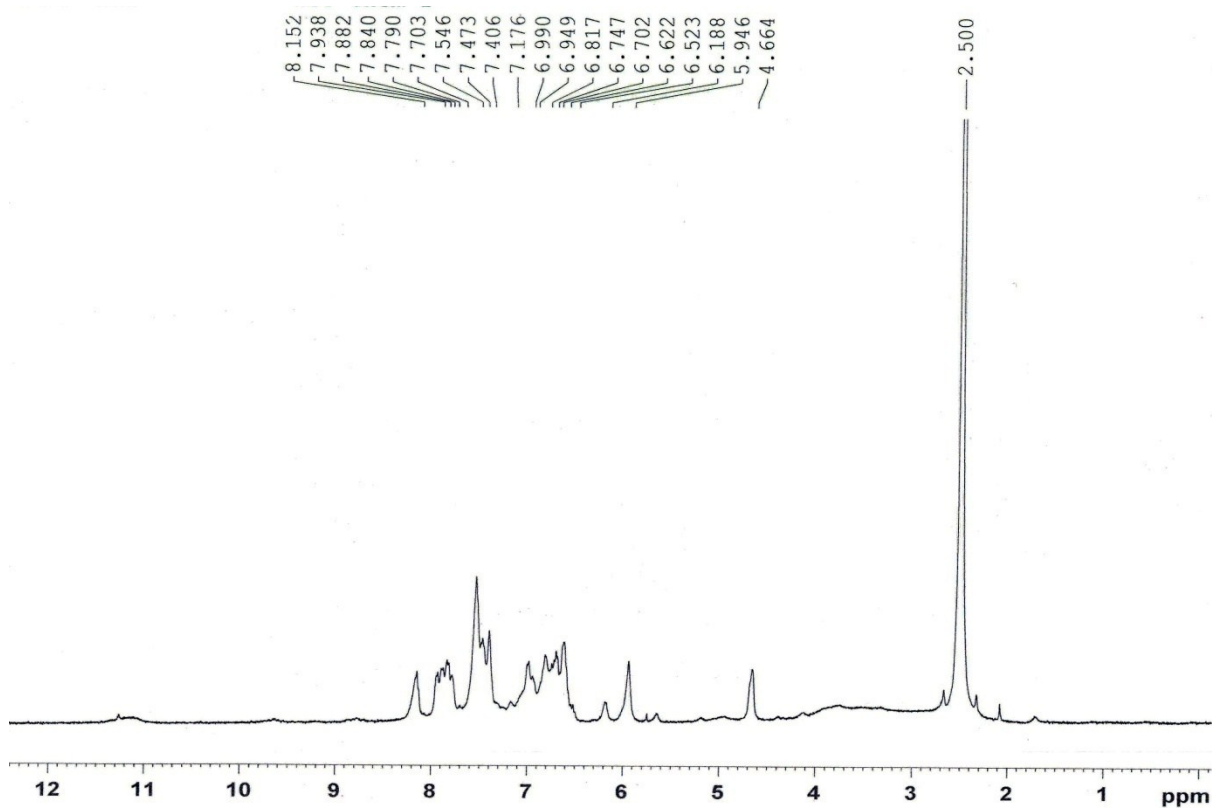

Fig. S20  $^1\text{H}$  NMR spectrum of complex 6.

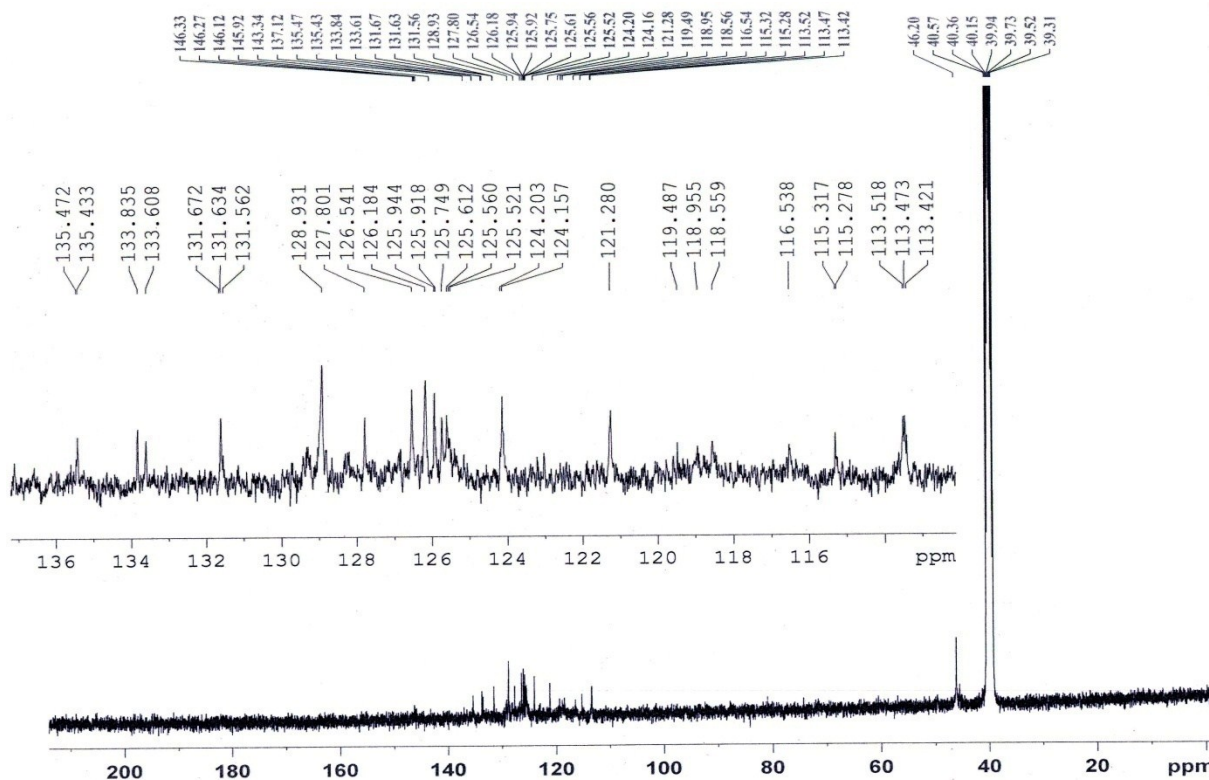

Fig. S21  $^{13}\text{C}$  NMR spectrum of complex 6.

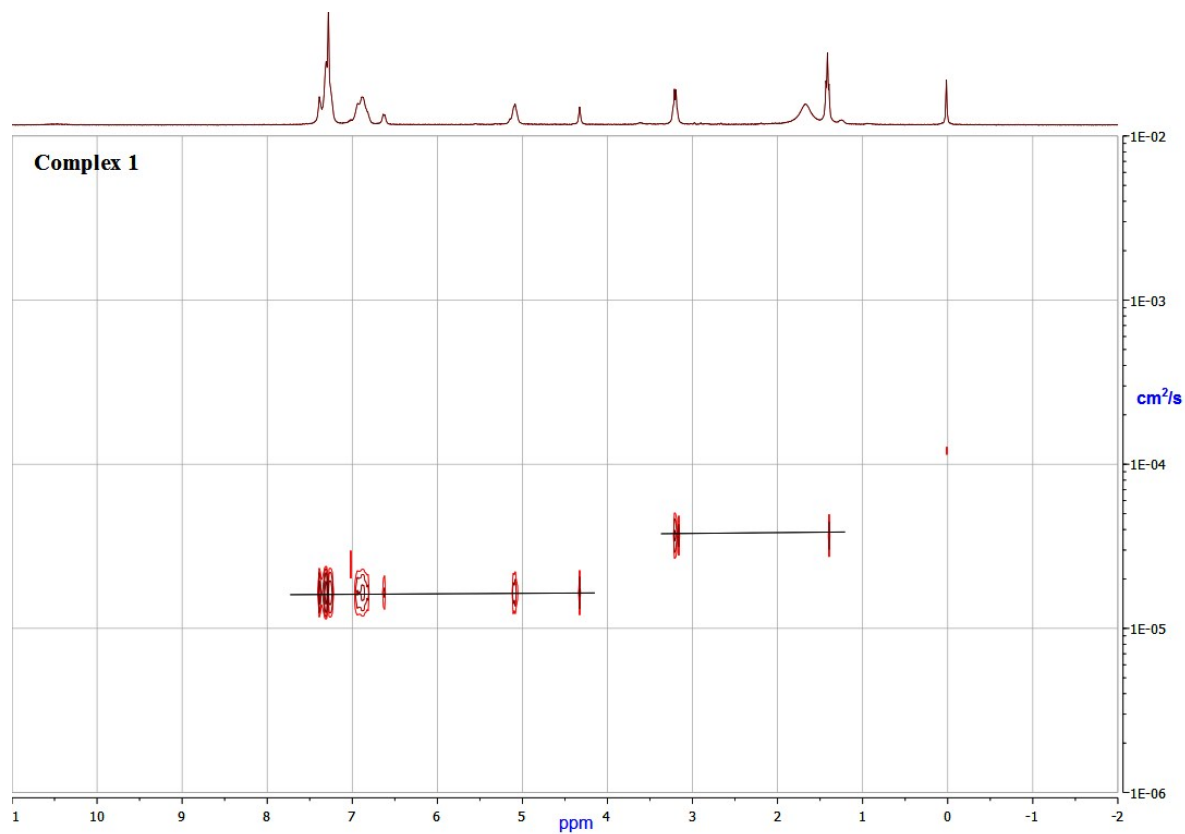

**Fig. S22**  $^1\text{H}$  DOSY NMR spectrum of complex 1.

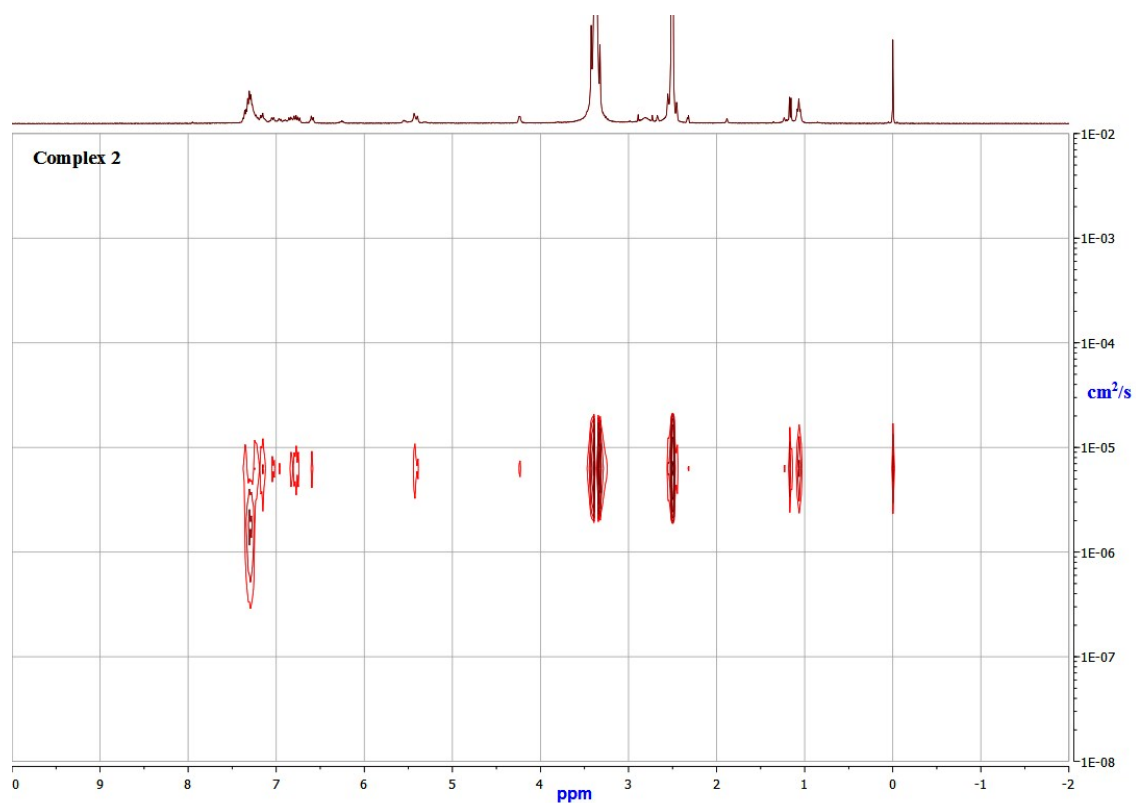

**Fig. S23**  $^1\text{H}$  DOSY NMR spectrum of complex 2.

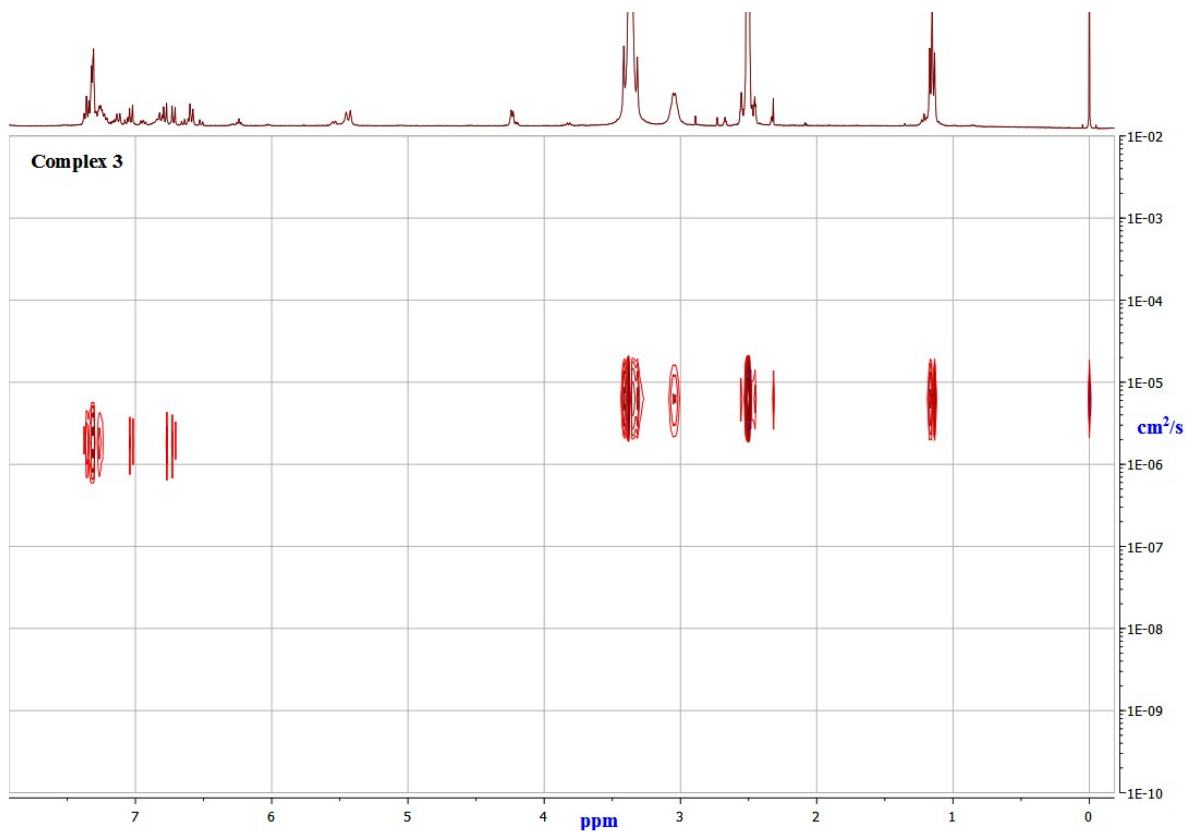

Fig. S24  $^1\text{H}$  DOSY NMR spectrum of complex 3.

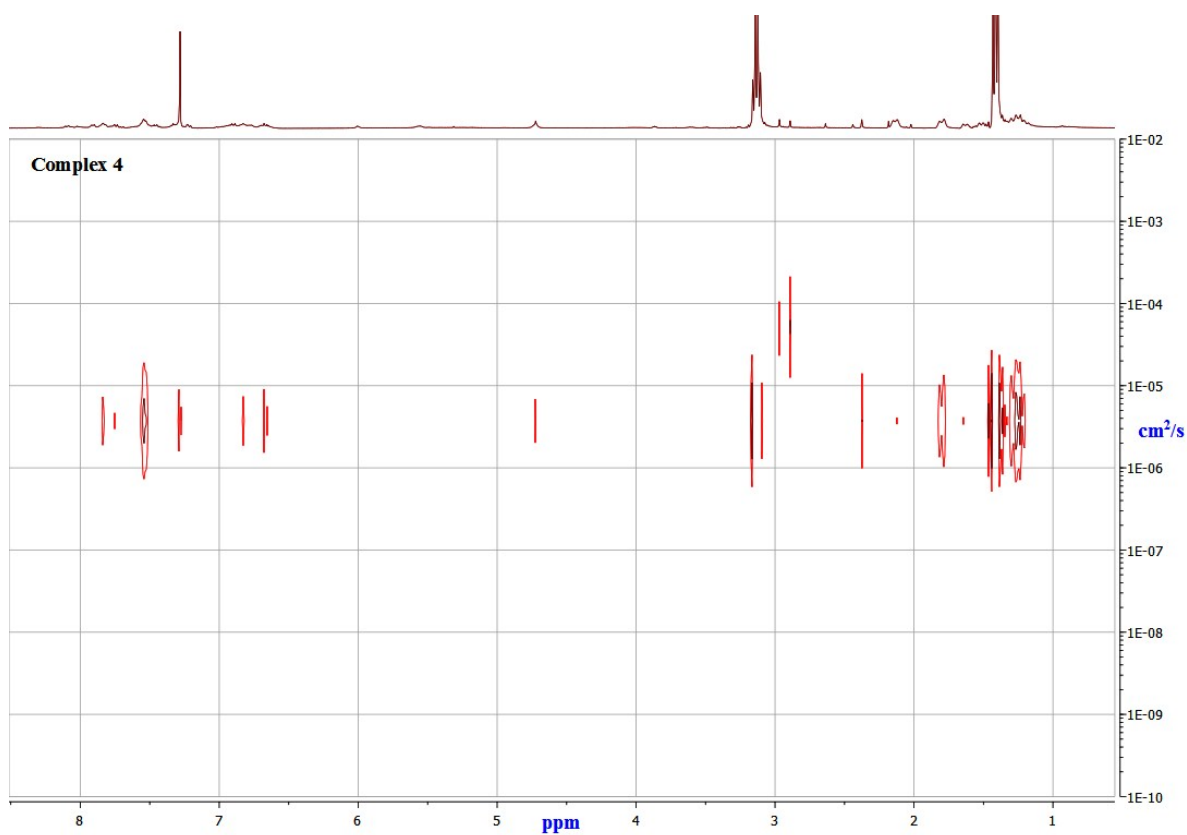

Fig. S25  $^1\text{H}$  DOSY NMR spectrum of complex 4.

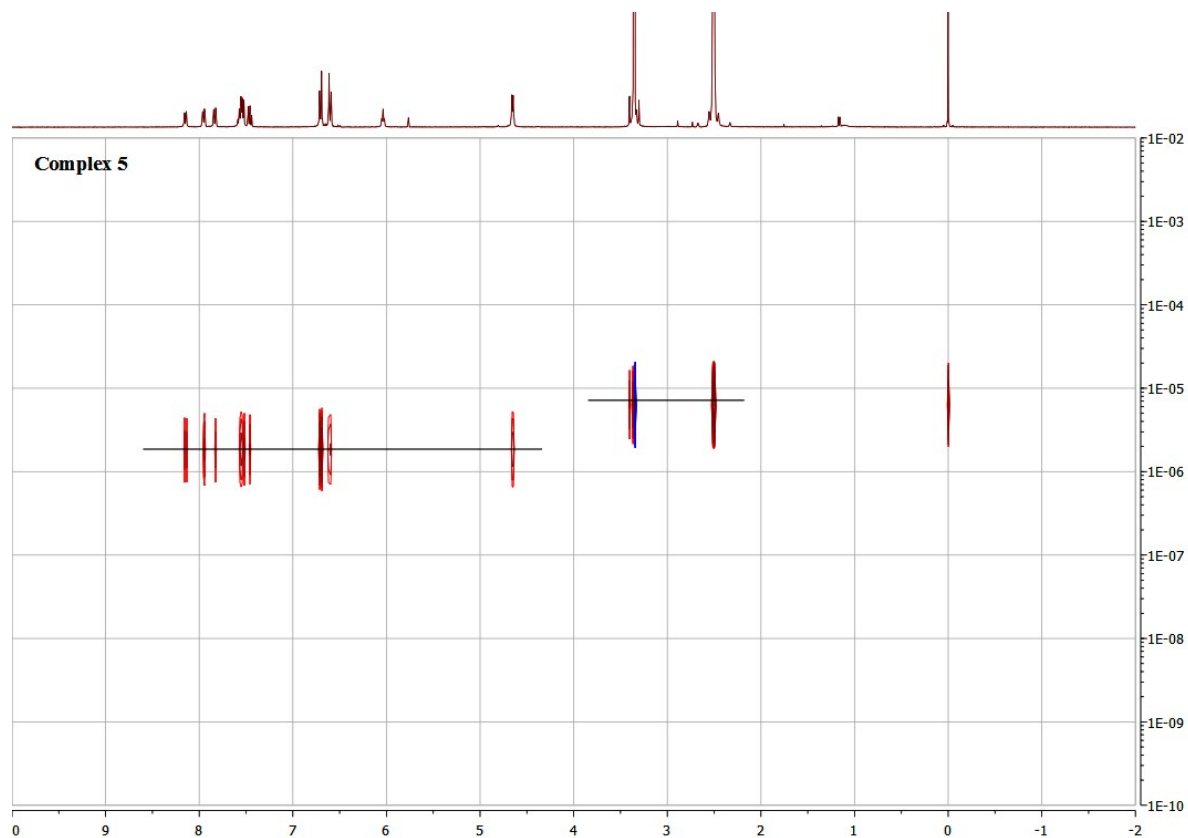

Fig. S26  $^1\text{H}$  DOSY NMR spectrum of complex 5.

## II. Optical Properties

### 1. UV-Visible Absorption

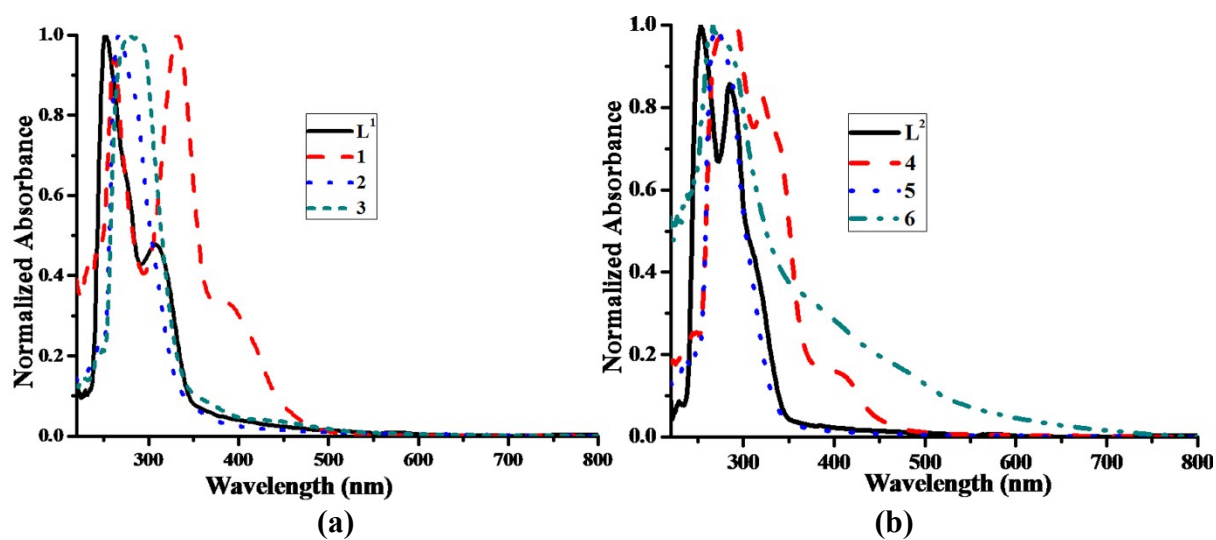

Fig. S27 UV-visible absorption spectra of compounds  $L^1$ ,  $L^2$  and 1-6 in  $10^{-5}$  M DMSO solution.



## 2. UV-visible transmittance (Optical Band gap)

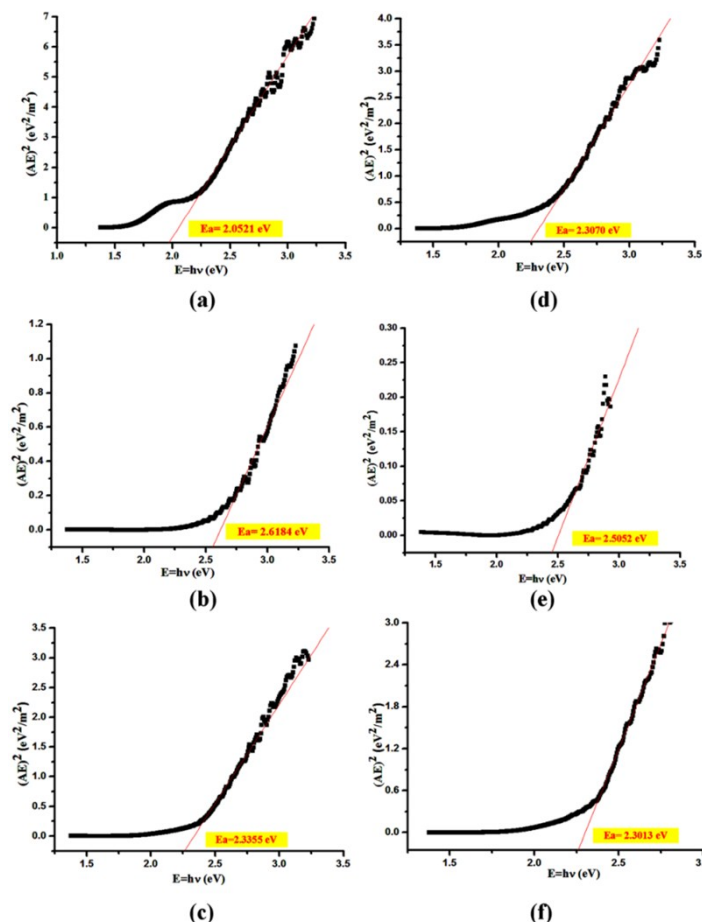

**Fig. S28** Tauc plot illustrating the optical band gap for **1-6** by UV-visible transmittance study.

### Optical Properties

#### UV-visible absorption, emission and transmittance

The UV-visible absorption and emission spectra of ligand precursors **L**<sup>1</sup>, **L**<sup>2</sup> and binuclear metallomacrocyclic dithiocarbamate complexes **1-6** were measured at room temperature from 10<sup>-5</sup> M DMSO solution samples. The UV-visible absorption of the investigated compounds is provided above (Fig. S27), while the emission spectra is provided in the manuscript. The pertinent results are summarized in Table S2.

**Table S2** UV-visible absorption, emission and optical band gap data for ligand precursors <sup>a</sup> **L**<sup>1</sup>, **L**<sup>2</sup> and binuclear metallomacrocyclic dithiocarbamate complexes **1-6**.

| Entry          | UV-Visible Absorption Spectral data                                       |  | Emission Spectral data                         |                            | Band Gap<br>Ea (eV) |
|----------------|---------------------------------------------------------------------------|--|------------------------------------------------|----------------------------|---------------------|
|                | $\lambda_{\max}$ nm ( $\epsilon$ , L mol <sup>-1</sup> cm <sup>-1</sup> ) |  | $\lambda_{\text{em}}$ nm (Intensity)           | $\lambda_{\text{ex}}$ (nm) |                     |
| L <sup>1</sup> | 253 (38616) $\pi \rightarrow \pi^*$ (phenyl)                              |  | 360 (36) $\pi^* \rightarrow n$ (dtc)           | 307                        | 2.1677              |
|                | 307 (17366) $n \rightarrow \pi^*$ (amine)                                 |  |                                                |                            |                     |
| L <sup>2</sup> | 253 (35066) $\pi \rightarrow \pi^*$ (phenyl)                              |  | 346 (7) $\pi^* \rightarrow \pi$ (phenyl)       | 284                        | 2.2897              |
|                | 285 (29934) $\pi \rightarrow \pi^*$ (amine)                               |  | 497 (8) $\pi^* \rightarrow \pi$ (phenyl)       |                            |                     |
| 1              | 261 (56324) $\pi \rightarrow \pi^*$ (phenyl)                              |  | 308 (193) $\pi^* \rightarrow \pi$ (phenyl)     | 261                        | 2.0521              |
|                | 332 (57565) $n \rightarrow \pi^*$ (N-C=S)                                 |  | 372(1000) $\pi^* \rightarrow \pi$ (phenyl)     |                            |                     |
|                | 388sh (19509) charge transfer                                             |  | 536(321) $\pi^* \rightarrow \pi$ (phenyl)      |                            |                     |
| 2              | 267(58322) $\pi \rightarrow \pi^*$ (phenyl)                               |  | 328(36) $\pi^* \rightarrow \pi$ (phenyl)       | 267                        | 2.6184              |
|                |                                                                           |  | 371(211) $\pi^* \rightarrow \pi$ (phenyl)      |                            |                     |
| 3              | 282 (52417) $\pi \rightarrow \pi^*$ (phenyl)                              |  | 416 (105) $\pi^* \rightarrow \pi$ (phenyl)     | 282                        | 2.3355              |
|                | 438 (21498) charge transfer                                               |  | 437 (114) br, $\pi^* \rightarrow \pi$ (phenyl) |                            |                     |

|   |                                                                                                                           |                                                                                                                                                                       |     |        |
|---|---------------------------------------------------------------------------------------------------------------------------|-----------------------------------------------------------------------------------------------------------------------------------------------------------------------|-----|--------|
| 4 | 286 (51860) $\pi \rightarrow \pi^*$ (phenyl)<br>326 (43096) $n \rightarrow \pi^*$ (N=C=S)<br>409sh (8102) charge transfer | 374 (165) $\pi^* \rightarrow n$ (dtc)<br>533 (517) $\pi^* \rightarrow n$ (dtc)<br>586 (355) $\pi^* \rightarrow n$ (dtc)<br>640 (269) $\pi^* \rightarrow n$ (overtone) | 326 | 2.3070 |
| 5 | 271 (45387) $\pi \rightarrow \pi^*$ (phenyl)                                                                              | 371 (697) $\pi^* \rightarrow \pi$ (phenyl)                                                                                                                            | 271 | 2.5052 |
| 6 | 265(15361) $\pi \rightarrow \pi^*$ (phenyl)<br>478(31961) charge transfer                                                 | 330 (775) $\pi^* \rightarrow \pi$ (phenyl)                                                                                                                            | 265 | 2.3013 |

a: For comparison, UV-visible absorption, emission and transmittance data retrieved from references 18a, 21 of the ms.

The fluorescence study evidently depicted the enhancement in fluorescence property of binuclear complexes **1-6**, compared to their respective ligand precursors **L<sup>1</sup>** and **L<sup>2</sup>**. This can be expected due to an efficient delocalization of  $\pi$ -electrons and conformational rigidity acquire by the macrocyclic molecular framework, reducing the nonradiative decay. All the complexes **1-6** exhibit maximum fluorescence emissions at 372, 371, 437, 533, 371 and 330 nm upon excitation at 261, 267, 282, 326, 271 and 265 nm with concomitant Stokes shifts of 111, 96, 155, 207, 100  $\approx$  65 nm, respectively. (Manuscript, Fig. 3) Notably, among **1-6**, complex **1** bearing Ni<sup>II</sup> centre exhibit the maximum fluorescence property which may be attributed to the reduction of photoinduced electron transfer process on complex formation. The emission spectra of majority of the complexes displayed similar patterns, i.e. two or more kinds of fluorescence emission bands are appearing by the excitation of single absorption bands (in any case, shoulder is appearing). Such a trend of fluorescence spectra and concomitant bathochromic shifts of intramolecular charge-transfer emissions is consistent with previous reports on transition metal dithiocarbamate complexes.

Furthermore, all the complexes **1-6** were investigated for their potential optical behaviour towards wide band-gap semiconducting nature using UV-visible transmittance measurements. The values of optical energy band gaps and their nature were derived from electronic excitation from the valence band to conduction band as described elsewhere. The optical absorption coefficients,  $\alpha$ ; were obtained from the transmittance spectrum of

complexes **1-6** using the formula:  $\alpha = \frac{1}{d} \ln \left[ \frac{1}{T} \right]$ , where, d is the thickness of the samples and T is the transmittance. The relation between the absorption coefficients ( $\alpha$ ) and the incident photon energy (hv) can be determined using the well known Davis and Mott equation,<sup>1</sup>  $\alpha hv = [D(hv - Eg)]^\gamma$  where, constant D is the edge width parameter. The exponent  $\gamma$  depends on the type of transition occur in the material. In order to determine optical band gap energies ( $Eg$ ) for binuclear metallomacrocyclic dithiocarbamate complexes **1-6**, we have applied the models for both direct and indirect transitions. For this, the  $(\alpha hv)^2$  (direct transition) and  $(\alpha hv)^{1/2}$  (indirect transitions) versus hv were plotted for each compound. The values of  $Eg$  obtained for an entire group of compounds **1-6** by extrapolating the linear part of the Tauc plot<sup>2</sup> (with  $c = 1/2$ ) (Fig. S28) suggest the absorption in these samples corresponds to a direct energy gap. The band gap energy for all the complexes falls in 2.1-2.6 eV range and exhibits a feature of direct band gap semiconductor. Expectedly the  $Eg$  for all the complexes (except **1**) are higher than their corresponding diamine precursors as polyamines are well known conducting materials with lower band gap energies.

### III. Thermogravimetric Study

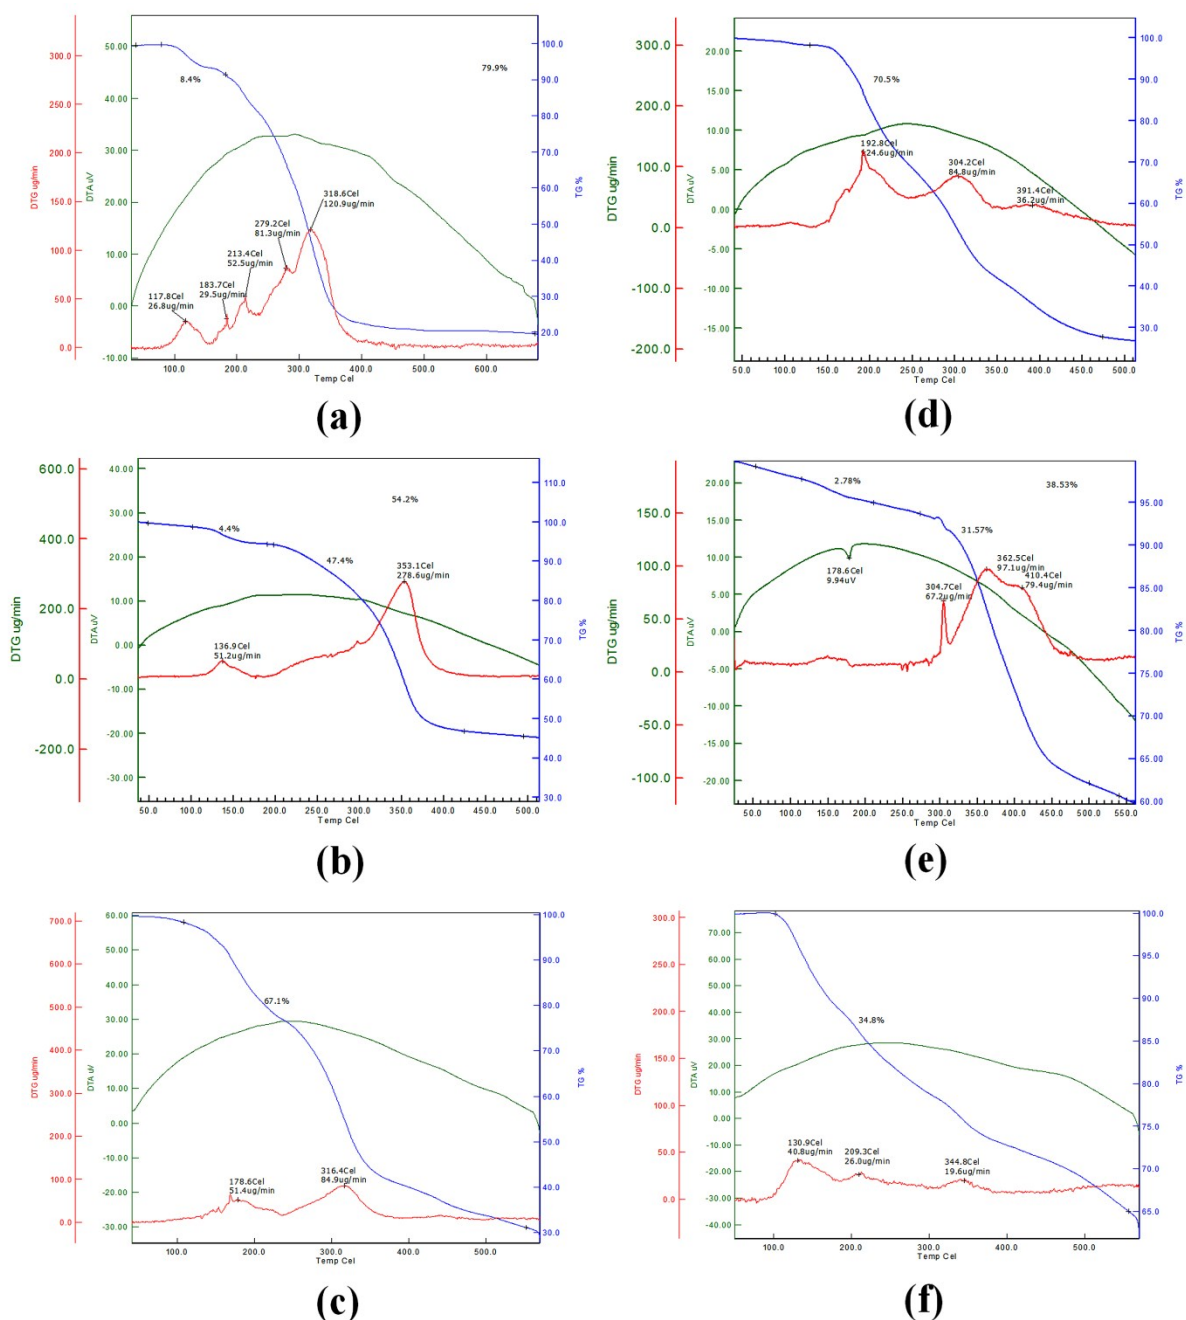

Fig. S29 TGA/DTA plots, (a-f): for binuclear complex 1-6.

#### Thermogravimetric Studies for 1-6

All the complexes **1-6** were studied for their thermal behaviour. The thermogravimetric study for **1-6** was performed at a heating rate of 10 °C /min under N<sub>2</sub> atmosphere from room temperature to 550 °C. The TGA/DTA plots and thermal analysis data are given in supplementary information (Fig. S29, Table S2).

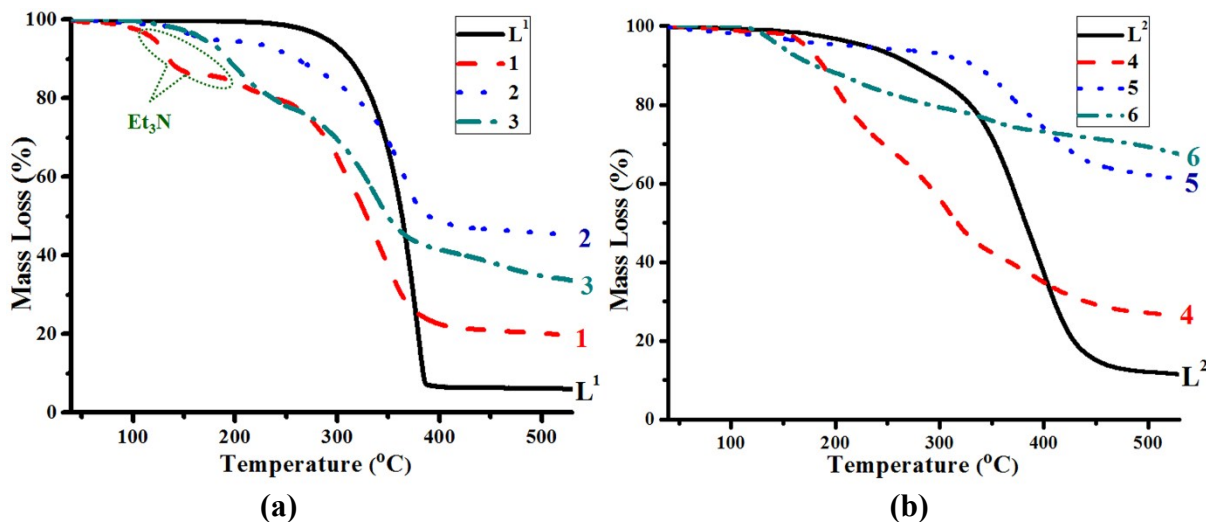

Fig. S30 TG plots (a) L<sup>1</sup>, 1-3 and (b) L<sup>2</sup>, 4-6.

Notably, all the dithiocarbamate complexes **1-6** showed a multistage thermal degradation pattern due to the elimination of different molecular fragments, evidence by TG curves (Fig. S30) which are indeed accompanied by corresponding peaks on DTG curves. This is consistent with the degradation patterns showed by several transition metal dithiocarbamate complexes.<sup>3</sup> Although, the thermal degradation of Zn<sup>II</sup>/Cd<sup>II</sup> complexes is continued at 550 °C, however, Ni<sup>II</sup> complexes **1** and **4** gave a stable residual mass of 20.1% and 29.5 % which correspond to NiS (calc. 14.18 % for **1** and 12.26 % for **4**) plus char, respectively. Reportedly the size and shape of the metal sulfide nanoparticles greatly depend on the nature of organic moiety present in metal dithiocarbamate complexes<sup>4</sup> which consecutively affect the fundamental properties such as optical, electrical and mechanical. The thermogravimetric analysis indicates the suitability complexes **1** and **4** as single source precursors for the synthesis of metal sulphide nano particles and thin films<sup>5</sup> which adds further merit to this work. Moreover, the binuclear Ni<sup>II</sup>dithiocarbamate macrocycles **1** display first weight loss of 8.4% in the temperature of 100-150°C which can be assigned to the loss of one triethyl amine molecule (calcd. 7.8%). The loss of triethyl amine fragment at much higher temperature than its boiling point confirms the association of **1** and Et<sub>3</sub>N. Earlier, the microanalysis and NMR data clearly evident the association of Et<sub>3</sub>N molecules with both of the Ni<sup>II</sup>dithiocarbamate macrocycles **1** and **4**, however the TG curve of **4** could not display the loss of Et<sub>3</sub>N molecule distinctly due to continuous mass loss.

Table S3 Thermogravimetric data for **1-6**.

| Compounds | Mass Loss% (Temperature °C)                          | DTG (°C)                                                                          | Residual content (%) | Inference                                                                                                                                                                                                                                                                                                                               |
|-----------|------------------------------------------------------|-----------------------------------------------------------------------------------|----------------------|-----------------------------------------------------------------------------------------------------------------------------------------------------------------------------------------------------------------------------------------------------------------------------------------------------------------------------------------|
| 1         | 8.4% (100-150)<br>79.9% (100-700)                    | 117.8 (26.8),<br>183.7 (29.5),<br>213.4 (52.5),<br>279.2 (81.3),<br>318.6 (120.9) | 20.1                 | 1 <sup>st</sup> stage: loss of Et <sub>3</sub> N molecules (calc. 7.8 %).<br>2 <sup>nd</sup> -4 <sup>th</sup> stage: continuous mass loss of ligand framework.<br>- at 400 °C stable residual mass obtained which corresponds to NiS (14.18 %) and char (5.92 %).<br>- Maximum rate of decomposition observed at 318.6 °C on DTG curve. |
| 2         | 4.4% (100-200)<br>47.4% (200-450)<br>54.2% (100-500) | 136.9 (51.2),<br>353.1 (278.6)                                                    | 45.8                 | 1 <sup>st</sup> stage: insignificant mass loss of solvent impurities.<br>2 <sup>nd</sup> stage: continues mass loss of ligand framework even at 550 °C.<br>- Maximum rate of decomposition observed at 353.1 °C on DTG curve.                                                                                                           |
| 3         | 67.1% (120-550)                                      | 178.6 (51.4),                                                                     | 32.9                 | 1 <sup>st</sup> -2 <sup>nd</sup> stage: continues mass loss of ligand framework                                                                                                                                                                                                                                                         |

|   |                                                         |                                              |       |                                                                                                                                                                                                                                                                                                             |
|---|---------------------------------------------------------|----------------------------------------------|-------|-------------------------------------------------------------------------------------------------------------------------------------------------------------------------------------------------------------------------------------------------------------------------------------------------------------|
|   |                                                         | 316.4 (84.9)                                 |       | even at 550 °C.                                                                                                                                                                                                                                                                                             |
| 4 | 70.5% (120-500)                                         | 192.8(124.6),<br>304.2(84.8),<br>319.4(36.2) | 29.5  | - Maximum rate of decomposition observed at 316.4 °C on DTG curve.<br>Thermally stable up to 150 °C.<br>1 <sup>st</sup> -3 <sup>rd</sup> stage: Continuous thermal decomposition which continues after 550 °C.<br>- at 550 °C residual mass obtained which corresponds to NiS (12.26 %) and char (17.24 %). |
| 5 | 2.78% (100-200)<br>31.57% (280-500)<br>38.53% (100-500) | 304.7(312.3),<br>362.5(97.1),<br>410.4(79.4) | 61.47 | - Maximum rate of decomposition observed at 192.8 °C on DTG curve.<br>1 <sup>st</sup> -3 <sup>rd</sup> stage: continues mass loss of ligand framework even at 550 °C.                                                                                                                                       |
| 6 | 34.8% (120-550)                                         | 130.9(40.8),<br>209.3(26.0),<br>344.8(19.6)  | 65.2  | - Maximum rate of decomposition observed at 304.7 °C on DTG curve.<br>1 <sup>st</sup> -3 <sup>rd</sup> stage: continues mass loss of ligand framework even at 550 °C.<br>- Maximum rate of decomposition observed at 130.9 °C on DTG curve.                                                                 |

#### IV. Host-Guest Interactions

The host-guest binding ability of some of the macrocyclic complexes (**1-4**) was explored towards a number of guest species viz. 1,4-dioxane, 4,4'-bipyridine, piperazine and triethyl amine by Job plot experiments using UV-vis absorption spectrophotometry.

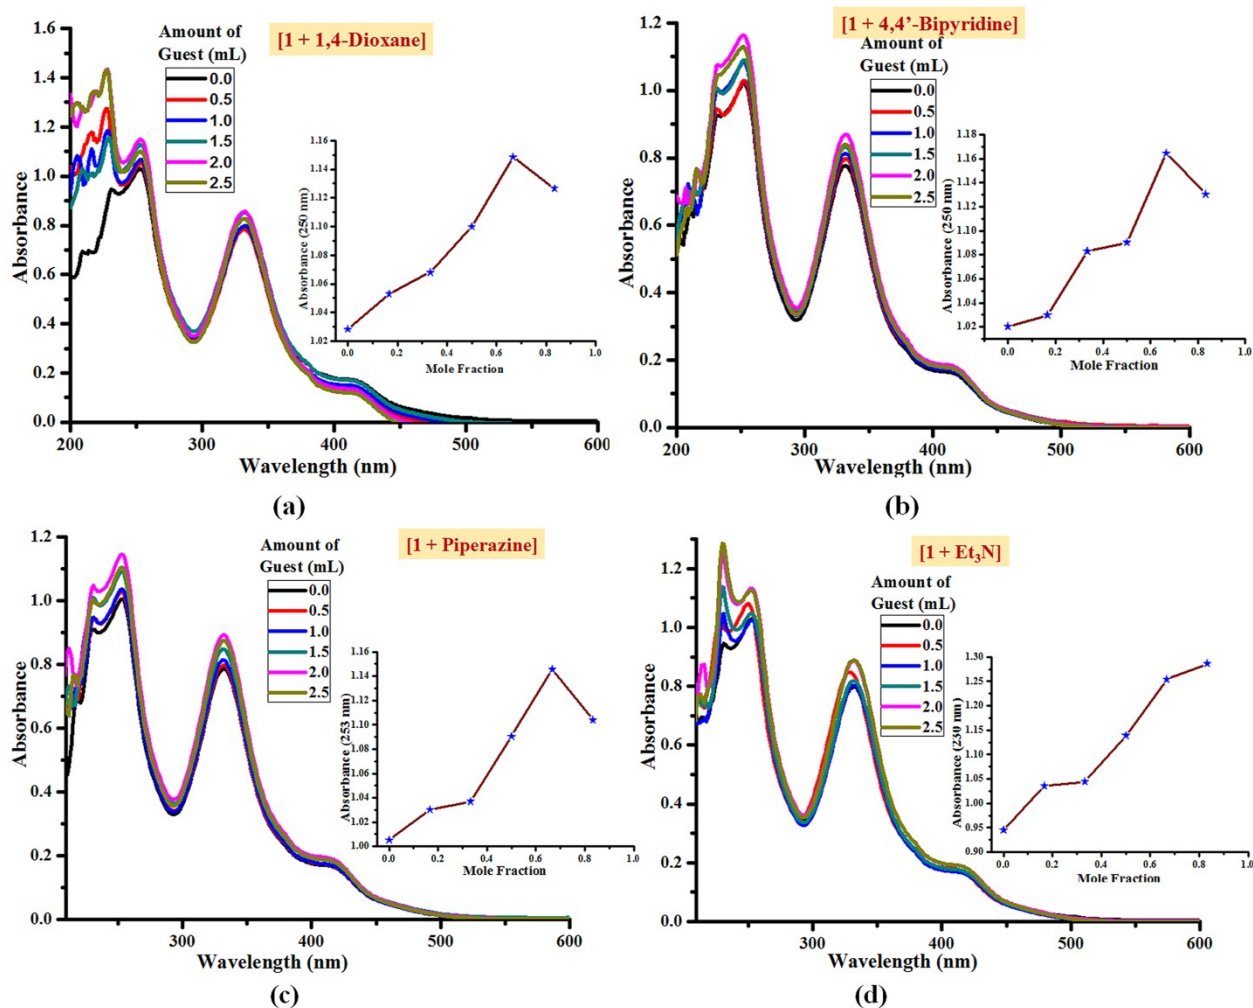

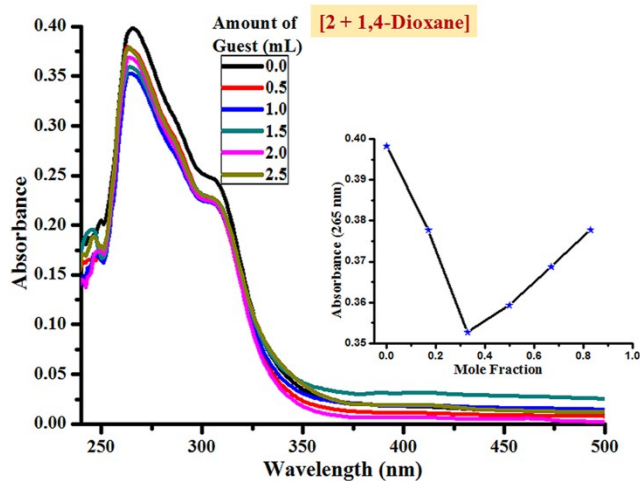

(e)

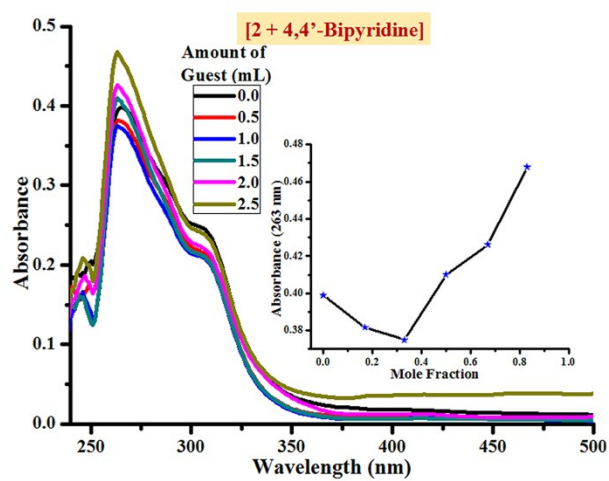

(f)

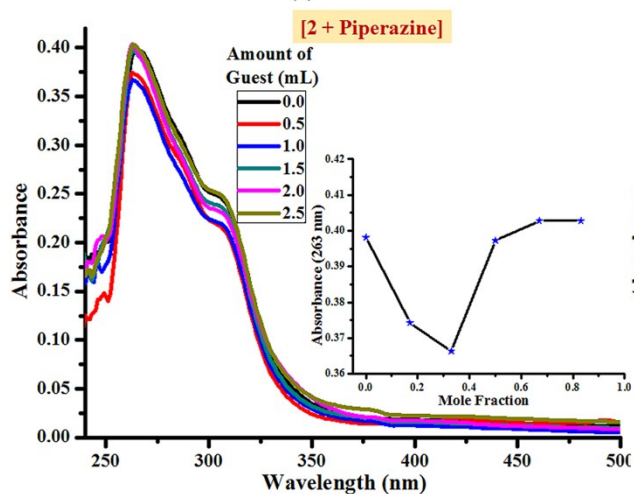

(g)

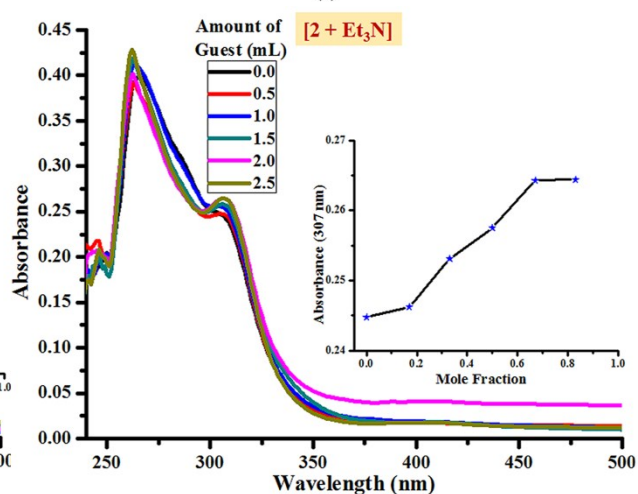

(h)

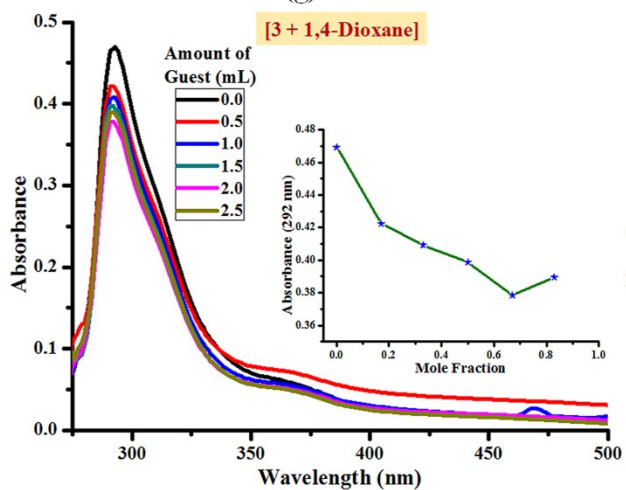

(i)

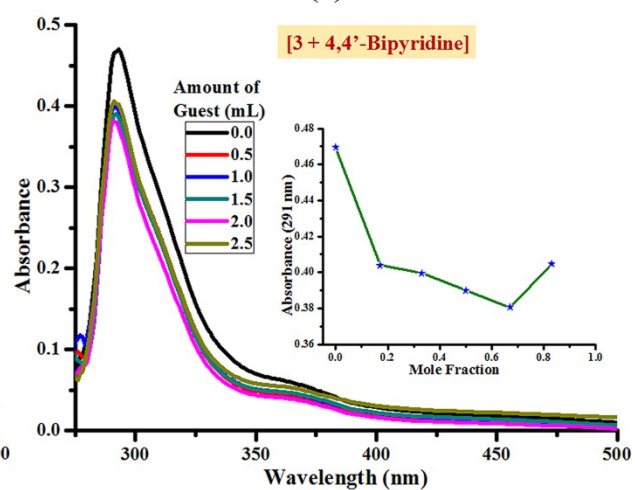

(j)

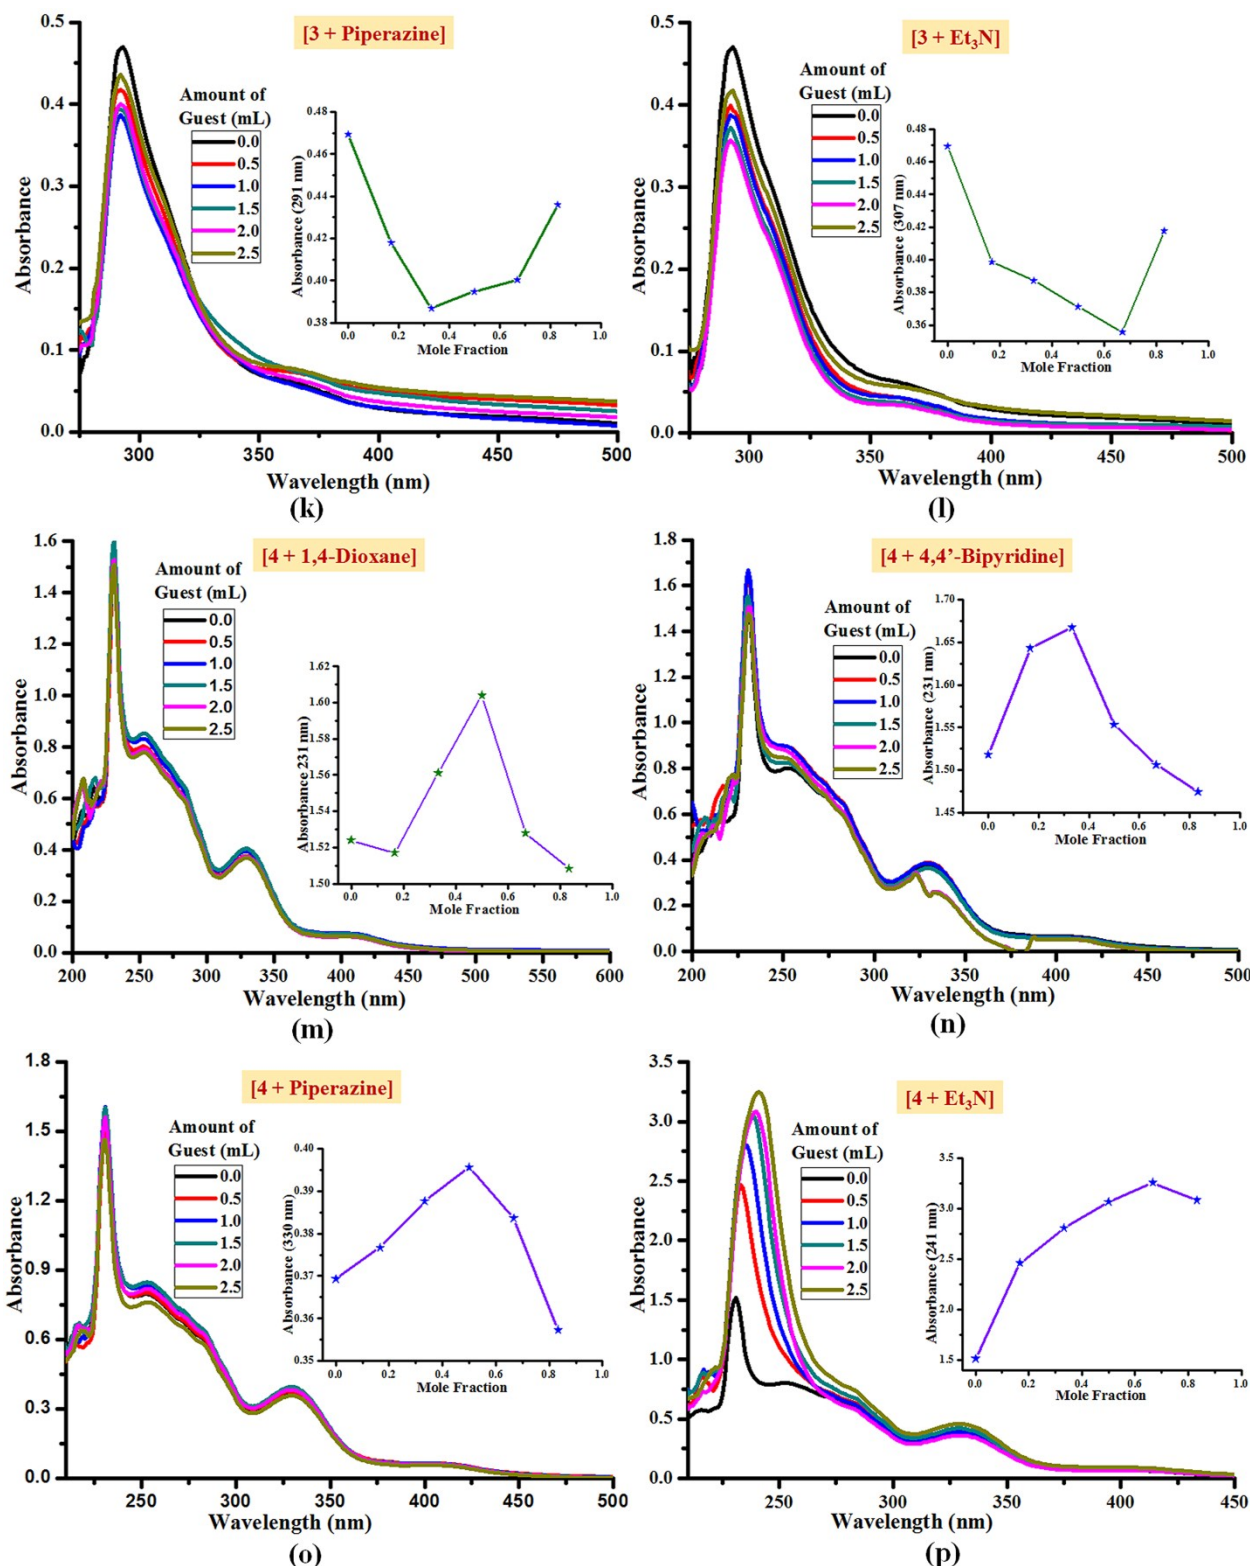

**Fig. S31** UV-visible absorption spectral change in Job Plot experiments of **1-4** with various guests. Inset shows the Job Plot for the interaction between hosts and guests consistent with 1:1 (m, o); 1:2 (a-c, i, j, l, p) and 2:1 (e-g, k, n) (host : guest) binding stoichiometries.

## V. Computational Investigation

The DFT calculations have been widely used in recent years due to its ability to provide reasonably good results even for huge molecular structures. All the calculations were performed with the Gaussian 03 program suite<sup>28</sup> and molecular orbitals were generated using

GaussView 3.0 program. In search of structural details, we performed a DFT study for geometry optimizations of L<sup>1</sup>-L<sup>2</sup> and 1-6 using B3LYP/6-31G (d, p) and B3LYP/LanL2DZ basis sets, respectively.

### 1. Cartesian Coordinates for Optimized Geometries

**Table S4** Coordinates for optimized geometry of diamine precursor L<sup>1</sup>.

| Atom<br>Type | Coordinates (Angstroms) |         |         |
|--------------|-------------------------|---------|---------|
|              | X                       | Y       | Z       |
| C1           | -3.8022                 | 0.8754  | -0.1235 |
| C2           | -2.7524                 | 0.1733  | 0.4917  |
| C3           | -1.4692                 | 0.7191  | 0.5653  |
| C4           | -1.2099                 | 1.9776  | 0.0247  |
| C5           | -2.2453                 | 2.6921  | -0.5841 |
| C6           | -3.5217                 | 2.1495  | -0.6541 |
| H7           | -2.9269                 | -0.8038 | 0.9277  |
| H8           | -0.6742                 | 0.1648  | 1.0523  |
| H9           | -2.0346                 | 3.6746  | -0.9938 |
| H10          | -4.3173                 | 2.7118  | -1.1369 |
| O11          | 0.0163                  | 2.6132  | 0.1247  |
| C12          | 1.1834                  | 1.8703  | 0.0508  |
| C13          | 2.1986                  | 2.1658  | 0.9554  |
| C14          | 1.4045                  | 0.915   | -0.9478 |
| C15          | 3.4336                  | 1.5201  | 0.8714  |
| H16          | 2.0197                  | 2.9179  | 1.7168  |
| C17          | 2.6261                  | 0.2583  | -1.0191 |
| H18          | 0.6198                  | 0.689   | -1.6621 |
| C19          | 3.666                   | 0.5439  | -0.1119 |
| H20          | 4.2098                  | 1.7819  | 1.5812  |
| H21          | 2.7864                  | -0.4902 | -1.7915 |
| N22          | -5.0904                 | 0.345   | -0.2614 |
| H23          | -5.8086                 | 1.0534  | -0.3427 |
| N24          | 4.8631                  | -0.1738 | -0.1981 |
| H25          | 5.057                   | -0.5261 | -1.1268 |
| C26          | 6.0618                  | 0.2756  | 0.497   |
| H27          | 6.3339                  | 1.3134  | 0.2399  |
| H28          | 5.8521                  | 0.27    | 1.5755  |
| C29          | -5.5184                 | -0.7976 | 0.5348  |
| H30          | -4.8819                 | -1.6538 | 0.2724  |
| H31          | -5.3828                 | -0.6318 | 1.6172  |
| C32          | 7.2315                  | -0.6429 | 0.2109  |
| C33          | 8.4635                  | -0.1242 | -0.2011 |
| C34          | 7.1015                  | -2.0302 | 0.3691  |
| C35          | 9.5485                  | -0.9692 | -0.4434 |
| C36          | 8.1818                  | -2.8761 | 0.1225  |
| H37          | 6.1452                  | -2.4394 | 0.6816  |
| C38          | 9.4098                  | -2.3477 | -0.283  |
| H39          | 8.0669                  | -3.9488 | 0.2494  |
| H40          | 10.2514                 | -3.0071 | -0.4741 |
| C41          | -6.9647                 | -1.1465 | 0.2514  |
| C42          | -7.8731                 | -1.3318 | 1.299   |
| C43          | -7.4135                 | -1.3054 | -1.0676 |
| C44          | -9.2011                 | -1.6769 | 1.0396  |
| C45          | -8.7402                 | -1.6444 | -1.329  |
| H46          | -6.7146                 | -1.1554 | -1.8853 |
| C47          | -9.6382                 | -1.8331 | -0.2756 |
| H48          | -9.0739                 | -1.7645 | -2.3558 |
| H49          | -10.6714                | -2.0981 | -0.4799 |
| H50          | -9.8932                 | -1.817  | 1.8649  |
| H51          | -7.5386                 | -1.2041 | 2.3254  |
| H52          | 8.5741                  | 0.9491  | -0.3342 |



|     |         |         |         |
|-----|---------|---------|---------|
| H53 | 10.4982 | -0.5499 | -0.7628 |
|-----|---------|---------|---------|

**Table S5** Coordinates for optimized geometry of diamine precursor L<sup>2</sup>.

| Atom<br>Type | Coordinates (Angstroms) |         |         |
|--------------|-------------------------|---------|---------|
|              | X                       | Y       | Z       |
| C1           | -3.8712                 | -1.5536 | 0.1586  |
| C2           | -2.9251                 | -0.6282 | -0.3127 |
| C3           | -1.6045                 | -1.0115 | -0.554  |
| C4           | -1.2033                 | -2.3275 | -0.3294 |
| C5           | -2.1343                 | -3.2626 | 0.1302  |
| C6           | -3.4482                 | -2.8804 | 0.3674  |
| H7           | -3.2098                 | 0.3998  | -0.5051 |
| H8           | -0.89                   | -0.2844 | -0.9249 |
| H9           | -1.8137                 | -4.2863 | 0.2932  |
| H10          | -4.1618                 | -3.6146 | 0.7336  |
| O11          | 0.0687                  | -2.7925 | -0.6181 |
| C12          | 1.1696                  | -1.9987 | -0.3415 |
| C13          | 2.2079                  | -1.9915 | -1.2682 |
| C14          | 1.3102                  | -1.2917 | 0.8581  |
| C15          | 3.386                   | -1.2892 | -1.0084 |
| H16          | 2.0925                  | -2.5541 | -2.1888 |
| C17          | 2.4748                  | -0.577  | 1.1066  |
| H18          | 0.5093                  | -1.3021 | 1.5896  |
| C19          | 3.5367                  | -0.5579 | 0.1812  |
| H20          | 4.1813                  | -1.3152 | -1.7442 |
| H21          | 2.5718                  | -0.0215 | 2.0365  |
| N22          | -5.1939                 | -1.2061 | 0.4666  |
| H23          | -5.8304                 | -1.9895 | 0.3854  |
| N24          | 4.6707                  | 0.2149  | 0.4669  |
| H25          | 4.8249                  | 0.324   | 1.4619  |
| C26          | 5.9117                  | 0.0042  | -0.2609 |
| H27          | 6.2595                  | -1.037  | -0.1658 |
| H28          | 5.716                   | 0.1624  | -1.3303 |
| C29          | -5.7743                 | 0.027   | -0.0399 |
| H30          | -5.1588                 | 0.8672  | 0.3096  |
| H31          | -5.7416                 | 0.0631  | -1.1407 |
| C32          | 7.0071                  | 0.9596  | 0.18    |
| C33          | 8.3829                  | 0.6554  | -0.0958 |
| C34          | 6.6934                  | 2.1443  | 0.8167  |
| C35          | 8.7996                  | -0.5183 | -0.7849 |
| C36          | 9.397                   | 1.5796  | 0.328   |
| C37          | 7.6965                  | 3.0521  | 1.231   |
| H38          | 5.651                   | 2.3882  | 0.9918  |
| C39          | 10.1315                 | -0.7707 | -1.0306 |
| H40          | 8.0594                  | -1.23   | -1.1332 |
| C41          | 10.7613                 | 1.2854  | 0.0634  |
| C42          | 9.0205                  | 2.7742  | 0.9982  |
| H43          | 7.4081                  | 3.9708  | 1.7332  |
| C44          | 11.1259                 | 0.1371  | -0.6004 |
| H45          | 10.4202                 | -1.6742 | -1.5597 |
| H46          | 11.5168                 | 1.9932  | 0.3947  |
| H47          | 9.7978                  | 3.4643  | 1.3151  |
| H48          | 12.1728                 | -0.0735 | -0.7973 |
| C49          | -7.1992                 | 0.232   | 0.4456  |
| C50          | -8.0796                 | 1.1257  | -0.2527 |
| C51          | -7.6527                 | -0.4102 | 1.5811  |
| C52          | -7.6888                 | 1.8647  | -1.4047 |
| C53          | -9.4195                 | 1.3011  | 0.2336  |
| C54          | -8.9731                 | -0.2321 | 2.0571  |
| H55          | -6.9739                 | -1.0583 | 2.1249  |
| C56          | -8.5662                 | 2.7129  | -2.0441 |

|     |          |         |         |
|-----|----------|---------|---------|
| H57 | -6.6795  | 1.769   | -1.7888 |
| C58 | -10.2998 | 2.1792  | -0.4532 |
| C59 | -9.841   | 0.6002  | 1.3951  |
| H60 | -9.2919  | -0.7593 | 2.9515  |
| C61 | -9.8876  | 2.8716  | -1.568  |
| H62 | -8.24    | 3.2647  | -2.9208 |
| H63 | -11.3119 | 2.2973  | -0.0748 |
| H64 | -10.8579 | 0.7414  | 1.7516  |
| H65 | -10.5713 | 3.541   | -2.0815 |

**Table S6** Coordinates for optimized geometry of binuclear Ni<sup>II</sup>dithiocarbamate complex **1**.

| Atom<br>Type | Coordinates (Angstroms) |         |         |
|--------------|-------------------------|---------|---------|
|              | X                       | Y       | Z       |
| C1           | -0.5697                 | 6.49    | -1.6208 |
| C2           | -0.9645                 | 5.7982  | -0.4714 |
| C3           | -0.0089                 | 5.1371  | 0.3045  |
| C4           | 1.3289                  | 5.134   | -0.0823 |
| C5           | 1.7161                  | 5.821   | -1.2363 |
| C6           | 0.7707                  | 6.5105  | -1.9995 |
| O7           | 3.0335                  | 5.8955  | -1.6563 |
| C8           | 3.8123                  | 4.749   | -1.5651 |
| C9           | 4.6449                  | 4.55    | -0.4644 |
| C10          | 5.4216                  | 3.3922  | -0.3889 |
| C11          | 5.3815                  | 2.4588  | -1.4284 |
| C12          | 4.5813                  | 2.69    | -2.553  |
| C13          | 3.786                   | 3.8304  | -2.6165 |
| N14          | -2.3547                 | 5.7899  | -0.0874 |
| N15          | 6.1729                  | 1.2543  | -1.3515 |
| C16          | -2.9327                 | 7.0864  | 0.3471  |
| C17          | -2.4285                 | 7.5299  | 1.7059  |
| C18          | 7.6347                  | 1.3881  | -1.557  |
| C19          | 8.392                   | 1.9378  | -0.3634 |
| C20          | -3.066                  | 4.6469  | -0.0734 |
| C21          | 5.5764                  | 0.0583  | -1.1731 |
| S22          | -2.4076                 | 3.1123  | -0.5134 |
| S23          | -4.7342                 | 4.5413  | 0.3864  |
| S24          | 3.8656                  | -0.1318 | -1.051  |
| S25          | 6.4283                  | -1.4433 | -1.0416 |
| C26          | -2.8906                 | 6.9062  | 2.8744  |
| C27          | -2.4215                 | 7.3134  | 4.1229  |
| C28          | -1.4884                 | 8.3496  | 4.2203  |
| C29          | -1.0253                 | 8.9759  | 3.0627  |
| C30          | -1.4929                 | 8.5651  | 1.8124  |
| C31          | 9.126                   | 3.1234  | -0.4814 |
| C32          | 9.8485                  | 3.6253  | 0.6038  |
| C33          | 9.8362                  | 2.9472  | 1.8229  |
| C34          | 9.1037                  | 1.763   | 1.9501  |
| C35          | 8.3894                  | 1.258   | 0.8642  |
| C36          | 0.149                   | -5.1277 | 0.7003  |
| C37          | 0.8708                  | -5.8559 | -0.2489 |
| C38          | 0.1916                  | -6.6311 | -1.194  |
| C39          | -1.2009                 | -6.6693 | -1.1983 |
| C40          | -1.9163                 | -5.9141 | -0.2661 |
| C41          | -1.2435                 | -5.1427 | 0.6855  |
| O42          | -3.2974                 | -6.0082 | -0.3108 |
| C43          | -4.0348                 | -4.8482 | -0.1124 |
| C44          | -4.5537                 | -4.5534 | 1.1486  |
| C45          | -5.2939                 | -3.3841 | 1.3273  |
| C46          | -5.5344                 | -2.5352 | 0.2437  |
| C47          | -5.0564                 | -2.8654 | -1.0282 |
| C48          | -4.2941                 | -4.0169 | -1.2036 |

|      |          |         |         |
|------|----------|---------|---------|
| N49  | 2.3129   | -5.8304 | -0.2534 |
| N50  | -6.2835  | -1.3206 | 0.448   |
| C51  | 3.0013   | -7.0987 | 0.0937  |
| C52  | 2.8849   | -7.447  | 1.5642  |
| C53  | -7.7313  | -1.4649 | 0.7341  |
| C54  | -8.5345  | -1.8777 | -0.4834 |
| C55  | 2.9893   | -4.6949 | -0.5107 |
| C56  | -5.6806  | -0.1191 | 0.3486  |
| S57  | 2.2215   | -3.1869 | -0.8557 |
| S58  | 4.7185   | -4.574  | -0.534  |
| S59  | -4.0085  | 0.0669  | -0.0374 |
| S60  | -6.4804  | 1.396   | 0.6002  |
| C61  | 2.0366   | -8.4774 | 1.9847  |
| C62  | 1.9263   | -8.8004 | 3.339   |
| C63  | 2.6631   | -8.0901 | 4.2873  |
| C64  | 3.5113   | -7.058  | 3.8762  |
| C65  | 3.6237   | -6.7386 | 2.5234  |
| C66  | -9.0669  | -3.1682 | -0.5783 |
| C67  | -9.8094  | -3.5512 | -1.6977 |
| C68  | -10.0218 | -2.6446 | -2.7366 |
| C69  | -9.4916  | -1.3539 | -2.6508 |
| C70  | -8.7542  | -0.9709 | -1.531  |
| H71  | -1.3126  | 6.9915  | -2.2341 |
| H72  | -0.3152  | 4.6143  | 1.2034  |
| H73  | 2.0632   | 4.6009  | 0.5108  |
| H74  | 1.0942   | 7.0344  | -2.8929 |
| H75  | 4.6686   | 5.2888  | 0.3303  |
| H76  | 6.0435   | 3.2077  | 0.4794  |
| H77  | 4.5636   | 1.9632  | -3.3583 |
| H78  | 3.1416   | 4.0149  | -3.4698 |
| H79  | -4.0184  | 6.973   | 0.3457  |
| H80  | -2.6734  | 7.8297  | -0.4126 |
| H81  | 8.0073   | 0.3964  | -1.8272 |
| H82  | 7.7739   | 2.0434  | -2.4229 |
| H83  | -3.6202  | 6.1039  | 2.8008  |
| H84  | -2.789   | 6.825   | 5.0214  |
| H85  | -1.1268  | 8.6677  | 5.1945  |
| H86  | -0.3006  | 9.7828  | 3.1301  |
| H87  | -1.1274  | 9.0529  | 0.9117  |
| H88  | 9.1324   | 3.6587  | -1.4283 |
| H89  | 10.4147  | 4.5465  | 0.4961  |
| H90  | 10.3947  | 3.3365  | 2.6698  |
| H91  | 9.0942   | 1.2276  | 2.8957  |
| H92  | 7.8297   | 0.3317  | 0.9635  |
| H93  | 0.6771   | -4.5388 | 1.4416  |
| H94  | 0.7494   | -7.1852 | -1.9434 |
| H95  | -1.7446  | -7.2581 | -1.9298 |
| H96  | -1.7995  | -4.5583 | 1.4097  |
| H97  | -4.3614  | -5.2256 | 1.9787  |
| H98  | -5.6659  | -3.1212 | 2.3132  |
| H99  | -5.2652  | -2.2105 | -1.8666 |
| H100 | -3.8969  | -4.2791 | -2.1787 |
| H101 | 2.5572   | -7.8897 | -0.5177 |
| H102 | 4.0457   | -6.9929 | -0.2059 |
| H103 | -7.8352  | -2.2129 | 1.526   |
| H104 | -8.0779  | -0.5085 | 1.131   |
| H105 | 1.4579   | -9.0304 | 1.2484  |
| H106 | 1.2652   | -9.6046 | 3.6505  |
| H107 | 2.5797   | -8.3398 | 5.3417  |
| H108 | 4.0908   | -6.5042 | 4.6099  |
| H109 | 4.2882   | -5.9396 | 2.2047  |
| H110 | -8.9002  | -3.8785 | 0.2284  |

|       |          |         |         |
|-------|----------|---------|---------|
| H111  | -10.2185 | -4.5562 | -1.7568 |
| H112  | -10.5991 | -2.9398 | -3.6087 |
| H113  | -9.658   | -0.6422 | -3.455  |
| H114  | -8.3489  | 0.0355  | -1.4629 |
| Ni115 | -4.4301  | 2.2922  | 0.0982  |
| Ni116 | 4.3266   | -2.348  | -0.8863 |

**Table S7** Coordinates for optimized geometry of binuclear Zn<sup>II</sup>dithiocarbamate complex **2**.

| Atom<br>Type | Coordinates (Angstroms) |         |         |
|--------------|-------------------------|---------|---------|
|              | X                       | Y       | Z       |
| C1           | 5.7077                  | -3.4506 | -0.637  |
| C2           | 5.1249                  | -2.5148 | -1.4928 |
| C3           | 3.8739                  | -2.7662 | -2.0664 |
| C4           | 3.1833                  | -3.9307 | -1.7527 |
| C5           | 3.7536                  | -4.8477 | -0.8629 |
| C6           | 5.0182                  | -4.6227 | -0.3197 |
| O7           | 3.0994                  | -6.0228 | -0.5338 |
| C8           | 1.7783                  | -5.9326 | -0.1334 |
| C9           | 1.3451                  | -4.9287 | 0.7396  |
| C10          | 0.0113                  | -4.8902 | 1.1292  |
| C11          | -0.8895                 | -5.8437 | 0.646   |
| C12          | -0.4454                 | -6.864  | -0.197  |
| C13          | 0.8928                  | -6.9103 | -0.5899 |
| N14          | 5.8023                  | -1.282  | -1.8244 |
| N15          | -2.2737                 | -5.7804 | 1.0545  |
| C16          | 6.7874                  | -1.3637 | -2.931  |
| C17          | 8.114                   | -1.9685 | -2.514  |
| C18          | -2.6652                 | -6.71   | 2.1454  |
| C19          | -2.0457                 | -6.3649 | 3.4851  |
| C20          | 5.4606                  | -0.1291 | -1.2126 |
| C21          | -3.1089                 | -4.8686 | 0.5159  |
| S22          | 6.1306                  | 1.4017  | -1.7289 |
| S23          | 4.3239                  | -0.1583 | 0.1018  |
| S24          | -2.5747                 | -3.8968 | -0.8234 |
| S25          | -4.7237                 | -4.6371 | 1.1469  |
| C26          | 8.5371                  | -3.1887 | -3.0528 |
| C27          | 9.7664                  | -3.7417 | -2.6858 |
| C28          | 10.5822                 | -3.08   | -1.7678 |
| C29          | 10.1662                 | -1.8615 | -1.2226 |
| C30          | 8.9424                  | -1.3068 | -1.5949 |
| C31          | -1.0272                 | -7.1617 | 4.0202  |
| C32          | -0.4567                 | -6.8535 | 5.2572  |
| C33          | -0.898                  | -5.7382 | 5.9697  |
| C34          | -1.9134                 | -4.9353 | 5.4422  |
| C35          | -2.4864                 | -5.2469 | 4.2095  |
| C36          | -4.0658                 | 2.4433  | -1.8584 |
| C37          | -5.3272                 | 2.1555  | -1.3263 |
| C38          | -5.921                  | 3.0272  | -0.4124 |
| C39          | -5.2323                 | 4.1685  | 0.0036  |
| C40          | -3.9576                 | 4.4275  | -0.4998 |
| C41          | -3.3758                 | 3.5771  | -1.4466 |
| O42          | -3.3054                 | 5.5709  | -0.0712 |
| C43          | -1.9868                 | 5.4469  | 0.3292  |
| C44          | -1.5648                 | 4.3804  | 1.1313  |
| C45          | -0.2335                 | 4.3088  | 1.5236  |
| C46          | 0.675                   | 5.2913  | 1.1167  |
| C47          | 0.2431                  | 6.371   | 0.3447  |
| C48          | -1.0933                 | 6.4487  | -0.0515 |
| N49          | -6.0031                 | 0.9553  | -1.7638 |
| N50          | 2.0515                  | 5.179   | 1.5437  |
| C51          | -6.9692                 | 1.1279  | -2.8765 |

|      |          |         |         |
|------|----------|---------|---------|
| C52  | -8.3001  | 1.7045  | -2.4339 |
| C53  | 2.4065   | 5.9368  | 2.7689  |
| C54  | 2.6054   | 7.4198  | 2.5248  |
| C55  | -5.6723  | -0.2442 | -1.242  |
| C56  | 2.898    | 4.3347  | 0.9189  |
| S57  | -6.3273  | -1.7271 | -1.8978 |
| S58  | -4.5635  | -0.3236 | 0.0942  |
| S59  | 2.3863   | 3.518   | -0.5282 |
| S60  | 4.5013   | 4.0323  | 1.5484  |
| C61  | -8.717   | 2.9589  | -2.8927 |
| C62  | -9.9502  | 3.4867  | -2.5018 |
| C63  | -10.7758 | 2.7647  | -1.6399 |
| C64  | -10.366  | 1.5114  | -1.1746 |
| C65  | -9.1384  | 0.9824  | -1.571  |
| C66  | 3.6621   | 7.8757  | 1.7221  |
| C67  | 3.8479   | 9.2413  | 1.5102  |
| C68  | 2.9858   | 10.1694 | 2.1023  |
| C69  | 1.9357   | 9.7243  | 2.9053  |
| C70  | 1.746    | 8.3555  | 3.1111  |
| H71  | 6.679    | -3.2495 | -0.1988 |
| H72  | 3.4348   | -2.0338 | -2.7367 |
| H73  | 2.203    | -4.1237 | -2.1757 |
| H74  | 5.4412   | -5.3548 | 0.3604  |
| H75  | 2.0446   | -4.1827 | 1.1008  |
| H76  | -0.3402  | -4.1132 | 1.7992  |
| H77  | -1.1496  | -7.6005 | -0.5726 |
| H78  | 1.255    | -7.6816 | -1.2617 |
| H79  | 6.9242   | -0.3516 | -3.317  |
| H80  | 6.3306   | -1.9694 | -3.7199 |
| H81  | -3.7546  | -6.7017 | 2.2011  |
| H82  | -2.3491  | -7.7111 | 1.8341  |
| H83  | 7.9015   | -3.71   | -3.7649 |
| H84  | 10.0819  | -4.6891 | -3.1145 |
| H85  | 11.5381  | -3.5085 | -1.4789 |
| H86  | 10.7999  | -1.339  | -0.511  |
| H87  | 8.6269   | -0.3542 | -1.1774 |
| H88  | -0.6771  | -8.029  | 3.4653  |
| H89  | 0.3323   | -7.4828 | 5.6602  |
| H90  | -0.4555  | -5.4955 | 6.9322  |
| H91  | -2.2647  | -4.0683 | 5.9953  |
| H92  | -3.2824  | -4.6276 | 3.8047  |
| H93  | -3.6185  | 1.7616  | -2.5752 |
| H94  | -6.9003  | 2.799   | -0.0067 |
| H95  | -5.664   | 4.8496  | 0.7297  |
| H96  | -2.3881  | 3.7964  | -1.8381 |
| H97  | -2.2693  | 3.6115  | 1.4297  |
| H98  | 0.1125   | 3.4771  | 2.1297  |
| H99  | 0.952    | 7.1304  | 0.034   |
| H100 | -1.4481  | 7.2684  | -0.6676 |
| H101 | -6.4975  | 1.7907  | -3.6086 |
| H102 | -7.1036  | 0.1494  | -3.3423 |
| H103 | 1.5946   | 5.7799  | 3.4862  |
| H104 | 3.3122   | 5.4842  | 3.1777  |
| H105 | -8.0737  | 3.5271  | -3.5608 |
| H106 | -10.2609 | 4.4615  | -2.868  |
| H107 | -11.7346 | 3.1734  | -1.3325 |
| H108 | -11.0073 | 0.9421  | -0.5071 |
| H109 | -8.8278  | 0.0032  | -1.2159 |
| H110 | 4.3402   | 7.1572  | 1.2688  |
| H111 | 4.6707   | 9.5825  | 0.8877  |
| H112 | 3.1349   | 11.2334 | 1.9387  |
| H113 | 1.2609   | 10.4388 | 3.369   |

|       |         |         |         |
|-------|---------|---------|---------|
| H114  | 0.9226  | 8.0117  | 3.733   |
| Zn115 | 4.4544  | 2.269   | -0.159  |
| Zn116 | -4.6699 | -2.7202 | -0.3842 |

**Table S8** Coordinates for optimized geometry of binuclear Cd<sup>II</sup>dithiocarbamate complex **3**.

| Atom<br>Type | Coordinates (Angstroms) |         |         |
|--------------|-------------------------|---------|---------|
|              | X                       | Y       | Z       |
| C1           | 0.123                   | 6.7991  | -0.0125 |
| C2           | -0.3784                 | 5.8289  | 0.8568  |
| C3           | 0.4533                  | 4.8051  | 1.3208  |
| C4           | 1.77                    | 4.7228  | 0.8829  |
| C5           | 2.2568                  | 5.6759  | -0.0181 |
| C6           | 1.4449                  | 6.724   | -0.4538 |
| O7           | 3.5657                  | 5.6408  | -0.466  |
| C8           | 4.0743                  | 4.4182  | -0.8697 |
| C9           | 5.352                   | 4.0635  | -0.437  |
| C10          | 5.9026                  | 2.8436  | -0.8345 |
| C11          | 5.1697                  | 1.988   | -1.6584 |
| C12          | 3.905                   | 2.3678  | -2.1201 |
| C13          | 3.3518                  | 3.5806  | -1.7269 |
| N14          | -1.7481                 | 5.8912  | 1.3114  |
| N15          | 5.7083                  | 0.7149  | -2.0814 |
| C16          | -2.0112                 | 6.8528  | 2.4134  |
| C17          | -1.3987                 | 6.4394  | 3.7372  |
| C18          | 6.5847                  | 0.7604  | -3.2774 |
| C19          | 7.9813                  | 1.2717  | -2.9824 |
| C20          | -2.6849                 | 5.0631  | 0.7979  |
| C21          | 5.3296                  | -0.4302 | -1.4705 |
| S22          | -2.2616                 | 4.0605  | -0.5597 |
| S23          | -4.2911                 | 5.0027  | 1.4848  |
| S24          | 4.3222                  | -0.3351 | -0.0577 |
| S25          | 5.8387                  | -1.9802 | -2.1026 |
| C26          | -1.9536                 | 5.3895  | 4.4849  |
| C27          | -1.3865                 | 5.0149  | 5.7027  |
| C28          | -0.262                  | 5.6858  | 6.1918  |
| C29          | 0.2937                  | 6.7331  | 5.4562  |
| C30          | -0.2722                 | 7.1047  | 4.2347  |
| C31          | 8.4323                  | 2.4683  | -3.5504 |
| C32          | 9.7244                  | 2.9352  | -3.2969 |
| C33          | 10.5766                 | 2.2103  | -2.4637 |
| C34          | 10.1332                 | 1.015   | -1.8895 |
| C35          | 8.8461                  | 0.546   | -2.1492 |
| C36          | -0.7804                 | -4.7552 | 1.6275  |
| C37          | 0.0101                  | -5.7882 | 1.1145  |
| C38          | -0.5654                 | -6.7844 | 0.324   |
| C39          | -1.9244                 | -6.7284 | 0.0108  |
| C40          | -2.6982                 | -5.6727 | 0.4943  |
| C41          | -2.1337                 | -4.6917 | 1.3165  |
| O42          | -4.0454                 | -5.6559 | 0.1771  |
| C43          | -4.5936                 | -4.4531 | -0.2331 |
| C44          | -5.8323                 | -4.0845 | 0.2932  |
| C45          | -6.4205                 | -2.8842 | -0.1085 |
| C46          | -5.769                  | -2.0621 | -1.0294 |
| C47          | -4.5475                 | -2.4583 | -1.5827 |
| C48          | -3.9548                 | -3.6507 | -1.1845 |
| N49          | 1.4169                  | -5.8354 | 1.4395  |
| N50          | -6.3631                 | -0.8121 | -1.4441 |
| C51          | 1.7872                  | -6.7711 | 2.5327  |
| C52          | 1.2952                  | -6.3318 | 3.8978  |
| C53          | -7.4391                 | -0.924  | -2.4616 |
| C54          | -6.9425                 | -1.3771 | -3.8205 |

|       |         |         |         |
|-------|---------|---------|---------|
| C55   | 2.2984  | -5.0199 | 0.8188  |
| C56   | -5.8982 | 0.3642  | -0.9666 |
| S57   | 1.7439  | -4.0478 | -0.5132 |
| S58   | 3.9641  | -4.9459 | 1.3443  |
| S59   | -4.7129 | 0.3458  | 0.3044  |
| S60   | -6.4793 | 1.8781  | -1.6235 |
| C61   | 0.2337  | -7.0016 | 4.5169  |
| C62   | -0.2204 | -6.6066 | 5.7773  |
| C63   | 0.3828  | -5.5311 | 6.43    |
| C64   | 1.4428  | -4.8553 | 5.8188  |
| C65   | 1.8987  | -5.2535 | 4.5624  |
| C66   | -7.2471 | -2.6584 | -4.2936 |
| C67   | -6.8005 | -3.0802 | -5.5479 |
| C68   | -6.0377 | -2.2226 | -6.3408 |
| C69   | -5.7275 | -0.9412 | -5.8763 |
| C70   | -6.1786 | -0.5189 | -4.626  |
| H71   | -0.5273 | 7.5913  | -0.3718 |
| H72   | 0.0594  | 4.0678  | 2.0119  |
| H73   | 2.4155  | 3.9218  | 1.2273  |
| H74   | 1.8482  | 7.4545  | -1.1474 |
| H75   | 5.8949  | 4.7356  | 0.2195  |
| H76   | 6.8841  | 2.5451  | -0.4831 |
| H77   | 3.3474  | 1.6977  | -2.7674 |
| H78   | 2.3631  | 3.8722  | -2.0651 |
| H79   | -3.0934 | 6.9611  | 2.4967  |
| H80   | -1.5967 | 7.8149  | 2.0955  |
| H81   | 6.6188  | -0.2493 | -3.6914 |
| H82   | 6.094   | 1.4113  | -4.0082 |
| H83   | -2.8332 | 4.8735  | 4.1097  |
| H84   | -1.8268 | 4.2022  | 6.2743  |
| H85   | 0.1762  | 5.3943  | 7.1426  |
| H86   | 1.1673  | 7.2605  | 5.8298  |
| H87   | 0.1656  | 7.9195  | 3.6625  |
| H88   | 7.7685  | 3.0393  | -4.1956 |
| H89   | 10.0604 | 3.8656  | -3.7468 |
| H90   | 11.5814 | 2.5719  | -2.2626 |
| H91   | 10.7944 | 0.4435  | -1.2435 |
| H92   | 8.508   | -0.389  | -1.7097 |
| H93   | -0.3277 | -3.9971 | 2.2573  |
| H94   | 0.0531  | -7.5833 | -0.0744 |
| H95   | -2.3873 | -7.4801 | -0.6201 |
| H96   | -2.749  | -3.8839 | 1.6984  |
| H97   | -6.3105 | -4.7276 | 1.0247  |
| H98   | -7.3678 | -2.5712 | 0.3207  |
| H99   | -4.0598 | -1.8219 | -2.313  |
| H100  | -2.9996 | -3.9559 | -1.5984 |
| H101  | 1.353   | -7.7426 | 2.2754  |
| H102  | 2.8733  | -6.8708 | 2.5188  |
| H103  | -8.1671 | -1.6434 | -2.0724 |
| H104  | -7.9266 | 0.0498  | -2.5248 |
| H105  | -0.2415 | -7.8381 | 4.0095  |
| H106  | -1.0446 | -7.1379 | 6.2455  |
| H107  | 0.0317  | -5.2215 | 7.4107  |
| H108  | 1.9202  | -4.0204 | 6.3249  |
| H109  | 2.7292  | -4.7333 | 4.0927  |
| H110  | -7.838  | -3.3316 | -3.6766 |
| H111  | -7.0468 | -4.0777 | -5.9019 |
| H112  | -5.688  | -2.5483 | -7.3168 |
| H113  | -5.1388 | -0.2666 | -6.4923 |
| H114  | -5.946  | 0.4814  | -4.2707 |
| Cd115 | -4.5857 | 2.933   | -0.1273 |
| Cd116 | 4.1105  | -2.9357 | -0.3598 |

**Table S9** Coordinates for optimized geometry of binuclear Ni<sup>II</sup>dithiocarbamate complex 4.

| Atom<br>Type | Coordinates (Angstroms) |         |         |
|--------------|-------------------------|---------|---------|
|              | X                       | Y       | Z       |
| C1           | -2.7944                 | 4.8117  | 2.4243  |
| C2           | -3.1553                 | 3.6896  | 1.6657  |
| C3           | -2.6885                 | 2.4277  | 2.0594  |
| C4           | -1.8491                 | 2.2952  | 3.1578  |
| C5           | -1.4075                 | 3.433   | 3.8418  |
| C6           | -1.9104                 | 4.6876  | 3.4977  |
| O7           | -0.4965                 | 3.3683  | 4.8821  |
| C8           | 0.5062                  | 2.4195  | 4.8358  |
| C9           | 0.9488                  | 1.8919  | 6.0508  |
| C10          | 1.9124                  | 0.8811  | 6.055   |
| C11          | 2.4164                  | 0.3863  | 4.8495  |
| C12          | 2.0252                  | 0.9748  | 3.6428  |
| C13          | 1.0951                  | 2.0057  | 3.6346  |
| N14          | -3.8413                 | 3.862   | 0.4097  |
| N15          | 3.2192                  | -0.8129 | 4.8264  |
| C16          | -3.3904                 | 4.9925  | -0.4288 |
| C17          | -4.2987                 | 6.2118  | -0.3903 |
| C18          | 2.4833                  | -2.0788 | 5.1318  |
| C19          | 1.5019                  | -2.499  | 4.0446  |
| C20          | -4.673                  | 2.9358  | -0.1301 |
| C21          | 4.4614                  | -0.8248 | 4.3052  |
| S22          | -4.9156                 | 2.7766  | -1.8405 |
| S23          | -5.5354                 | 1.7314  | 0.7629  |
| S24          | 5.3173                  | 0.6035  | 3.8305  |
| S25          | 5.3393                  | -2.2767 | 3.9251  |
| C26          | -3.9134                 | 7.3763  | -1.1347 |
| C27          | -4.7641                 | 8.5316  | -1.1039 |
| C28          | -5.965                  | 8.4947  | -0.3443 |
| C29          | -6.3114                 | 7.3656  | 0.3563  |
| C30          | -5.4736                 | 6.2238  | 0.3323  |
| C31          | 1.9927                  | -3.2086 | 2.9612  |
| C32          | 1.1561                  | -3.6189 | 1.8986  |
| C33          | -0.1848                 | -3.3172 | 1.9219  |
| C34          | -0.7466                 | -2.6102 | 3.0173  |
| C35          | 0.098                   | -2.1958 | 4.1066  |
| C36          | 3.5896                  | -1.8835 | -1.3506 |
| C37          | 4.6736                  | -1.4634 | -2.133  |
| C38          | 4.671                   | -1.7417 | -3.5053 |
| C39          | 3.5756                  | -2.3742 | -4.0956 |
| C40          | 2.4848                  | -2.7554 | -3.3126 |
| C41          | 2.5156                  | -2.5485 | -1.9288 |
| O42          | 1.4263                  | -3.3674 | -3.9575 |
| C43          | 0.1353                  | -3.1873 | -3.5012 |
| C44          | -0.763                  | -4.238  | -3.6987 |
| C45          | -2.0799                 | -4.1238 | -3.2513 |
| C46          | -2.5025                 | -2.9692 | -2.5807 |
| C47          | -1.6026                 | -1.9075 | -2.4182 |
| C48          | -0.3029                 | -2.0019 | -2.9    |
| N49          | 5.6879                  | -0.6122 | -1.5647 |
| N50          | -3.7857                 | -2.9352 | -1.9264 |
| C51          | 5.9728                  | 0.6417  | -2.291  |
| C52          | 7.2552                  | 0.6242  | -3.1088 |
| C53          | -4.1347                 | -4.1068 | -1.0987 |
| C54          | -5.1285                 | -5.0652 | -1.7382 |
| C55          | 6.1835                  | -0.787  | -0.314  |
| C56          | -4.5521                 | -1.8184 | -1.8599 |



|      |         |         |         |
|------|---------|---------|---------|
| S57  | 6.804   | 0.516   | 0.6458  |
| S58  | 6.1845  | -2.2923 | 0.5347  |
| S59  | -4.46   | -0.5008 | -2.973  |
| S60  | -5.6897 | -1.5291 | -0.5855 |
| C61  | 7.5802  | 1.7781  | -3.8971 |
| C62  | 8.7876  | 1.7705  | -4.6725 |
| C63  | 9.6326  | 0.6279  | -4.6382 |
| C64  | 9.2998  | -0.4614 | -3.8713 |
| C65  | 8.1071  | -0.4607 | -3.1071 |
| C66  | -5.6897 | -4.8174 | -2.9736 |
| C67  | -6.6181 | -5.7165 | -3.5537 |
| C68  | -6.9787 | -6.8639 | -2.8911 |
| C69  | -6.4276 | -7.1634 | -1.6155 |
| C70  | -5.4884 | -6.2552 | -1.0221 |
| C71  | -2.7213 | 7.4419  | -1.9087 |
| C72  | -2.3862 | 8.5814  | -2.6088 |
| C73  | -3.2256 | 9.7185  | -2.5728 |
| C74  | -4.3881 | 9.6892  | -1.8359 |
| C75  | -2.136  | -2.3108 | 3.0537  |
| C76  | -2.6938 | -1.6436 | 4.1196  |
| C77  | -1.8729 | -1.2489 | 5.2025  |
| C78  | -0.5208 | -1.5155 | 5.1936  |
| C79  | 6.7588  | 2.9388  | -3.9471 |
| C80  | 7.106   | 4.027   | -4.7192 |
| C81  | 8.2948  | 4.0136  | -5.4844 |
| C82  | 9.1145  | 2.9078  | -5.4578 |
| C83  | -6.7883 | -8.3442 | -0.9134 |
| C84  | -6.2536 | -8.628  | 0.3232  |
| C85  | -5.3296 | -7.7349 | 0.9126  |
| C86  | -4.9577 | -6.5803 | 0.2573  |
| H87  | -3.1712 | 5.7931  | 2.1557  |
| H88  | -2.9643 | 1.5428  | 1.5017  |
| H89  | -1.501  | 1.31    | 3.4459  |
| H90  | -1.5906 | 5.5612  | 4.0563  |
| H91  | 0.5145  | 2.2558  | 6.9762  |
| H92  | 2.2429  | 0.4522  | 6.9968  |
| H93  | 2.4405  | 0.6126  | 2.7095  |
| H94  | 0.7894  | 2.4492  | 2.6946  |
| H95  | -2.3841 | 5.2545  | -0.0906 |
| H96  | -3.2945 | 4.6247  | -1.4559 |
| H97  | 3.235   | -2.8556 | 5.2737  |
| H98  | 1.9863  | -1.93   | 6.0917  |
| H99  | -6.6033 | 9.3747  | -0.33   |
| H100 | -7.2309 | 7.3364  | 0.934   |
| H101 | -5.7706 | 5.343   | 0.8926  |
| H102 | 3.0495  | -3.4514 | 2.9257  |
| H103 | 1.5832  | -4.1808 | 1.0723  |
| H104 | -0.8377 | -3.6224 | 1.1073  |
| H105 | 3.5753  | -1.6818 | -0.2869 |
| H106 | 5.5105  | -1.4363 | -4.1217 |
| H107 | 3.5524  | -2.5626 | -5.1639 |
| H108 | 1.685   | -2.8602 | -1.3061 |
| H109 | -0.4197 | -5.1426 | -4.1898 |
| H110 | -2.7704 | -4.948  | -3.3994 |
| H111 | -1.9129 | -1.0055 | -1.9058 |
| H112 | 0.3781  | -1.1694 | -2.7683 |
| H113 | 5.1115  | 0.8324  | -2.9376 |
| H114 | 6.0053  | 1.4522  | -1.5545 |
| H115 | -3.1967 | -4.6241 | -0.8768 |
| H116 | -4.53   | -3.7358 | -0.1463 |
| H117 | 10.5464 | 0.634   | -5.2273 |
| H118 | 9.9478  | -1.3327 | -3.8418 |

|       |         |         |         |
|-------|---------|---------|---------|
| H119  | 7.8679  | -1.3326 | -2.5067 |
| H120  | -5.4244 | -3.9151 | -3.5152 |
| H121  | -7.0422 | -5.4858 | -4.5267 |
| H122  | -7.6912 | -7.558  | -3.3299 |
| H123  | -2.0605 | 6.5822  | -1.9588 |
| H124  | -1.4712 | 8.6057  | -3.1943 |
| H125  | -2.9514 | 10.611  | -3.1284 |
| H126  | -5.0418 | 10.5577 | -1.8038 |
| H127  | -2.757  | -2.6228 | 2.2171  |
| H128  | -3.7571 | -1.4227 | 4.1337  |
| H129  | -2.3129 | -0.729  | 6.0492  |
| H130  | 0.0784  | -1.1848 | 6.0328  |
| H131  | 5.8428  | 2.9792  | -3.366  |
| H132  | 6.4627  | 4.9025  | -4.7388 |
| H133  | 8.5586  | 4.8768  | -6.0892 |
| H134  | 10.0325 | 2.8888  | -6.0406 |
| H135  | -7.5013 | -9.0238 | -1.3741 |
| H136  | -6.5399 | -9.5348 | 0.8487  |
| H137  | -4.9111 | -7.9598 | 1.8898  |
| H138  | -4.2497 | -5.9109 | 0.7354  |
| Ni139 | 6.1824  | -0.8858 | 2.3313  |
| Ni140 | -5.3904 | 0.6376  | -1.2329 |

**Table S10** Coordinates for optimized geometry of binuclear Zn<sup>II</sup>dithiocarbamate complex **5**.

| Atom<br>Type | Coordinates (Angstroms) |         |         |
|--------------|-------------------------|---------|---------|
|              | X                       | Y       | Z       |
| C1           | 5.6528                  | -3.4312 | -0.8231 |
| C2           | 4.9621                  | -2.3965 | -1.4569 |
| C3           | 3.6387                  | -2.5888 | -1.8686 |
| C4           | 2.9916                  | -3.7918 | -1.614  |
| C5           | 3.6774                  | -4.8134 | -0.9467 |
| C6           | 5.0088                  | -4.643  | -0.5667 |
| O7           | 3.0884                  | -6.038  | -0.6914 |
| C8           | 1.7673                  | -6.0529 | -0.2801 |
| C9           | 0.9016                  | -6.9598 | -0.8927 |
| C10          | -0.4348                 | -7.0101 | -0.4942 |
| C11          | -0.8947                 | -6.1555 | 0.5095  |
| C12          | -0.0133                 | -5.2753 | 1.1439  |
| C13          | 1.3194                  | -5.2214 | 0.7516  |
| N14          | 5.6062                  | -1.1356 | -1.7536 |
| N15          | -2.2819                 | -6.1807 | 0.911   |
| C16          | 6.5802                  | -1.1468 | -2.8609 |
| C17          | 8.0379                  | -1.268  | -2.4387 |
| C18          | -2.6615                 | -7.2215 | 1.904   |
| C19          | -2.1078                 | -6.9764 | 3.2979  |
| C20          | 5.2127                  | 0.0076  | -1.1455 |
| C21          | -3.1423                 | -5.2595 | 0.4309  |
| S22          | 5.7705                  | 1.5547  | -1.7235 |
| S23          | 4.142                   | -0.0625 | 0.222   |
| S24          | -4.7888                 | -5.1603 | 1.0129  |
| S25          | -2.608                  | -4.1413 | -0.789  |
| C26          | 9.0285                  | -1.5025 | -3.4495 |
| C27          | 10.4053                 | -1.615  | -3.0592 |
| C28          | 10.7559                 | -1.4838 | -1.6883 |
| C29          | 9.7888                  | -1.2466 | -0.7427 |
| C30          | 8.4289                  | -1.1378 | -1.1225 |
| C31          | -2.7679                 | -6.0694 | 4.1094  |
| C32          | -2.3279                 | -5.7936 | 5.423   |
| C33          | -1.2273                 | -6.4436 | 5.93    |
| C34          | -0.5185                 | -7.3888 | 5.1434  |

|     |          |         |         |
|-----|----------|---------|---------|
| C35 | -0.951   | -7.6628 | 3.799   |
| C36 | -6.3137  | 2.4596  | -0.2788 |
| C37 | -5.6761  | 1.696   | -1.2575 |
| C38 | -4.4471  | 2.1077  | -1.783  |
| C39 | -3.8336  | 3.2606  | -1.3059 |
| C40 | -4.4564  | 3.9997  | -0.2942 |
| C41 | -5.7004  | 3.6149  | 0.2073  |
| O42 | -3.8865  | 5.1572  | 0.2053  |
| C43 | -2.5409  | 5.1372  | 0.5232  |
| C44 | -1.9578  | 4.0491  | 1.183   |
| C45 | -0.6051  | 4.0873  | 1.4982  |
| C46 | 0.1698   | 5.2012  | 1.1554  |
| C47 | -0.425   | 6.2996  | 0.5321  |
| C48 | -1.7841  | 6.2676  | 0.2142  |
| N49 | -6.2686  | 0.478   | -1.7604 |
| N50 | 1.5719   | 5.2092  | 1.5109  |
| C51 | -7.1509  | 0.6194  | -2.9486 |
| C52 | -8.5351  | 1.1537  | -2.6217 |
| C53 | 1.9483   | 6.0547  | 2.6593  |
| C54 | 2.4991   | 7.4273  | 2.2974  |
| C55 | -5.9132  | -0.7134 | -1.2368 |
| C56 | 2.4472   | 4.3682  | 0.9125  |
| S57 | -4.8828  | -0.7618 | 0.1636  |
| S58 | -6.4458  | -2.2173 | -1.9534 |
| S59 | 1.9682   | 3.4828  | -0.5046 |
| S60 | 4.056    | 4.1647  | 1.5513  |
| C61 | -8.9099  | 2.5193  | -2.8539 |
| C62 | -10.2566 | 2.9231  | -2.5491 |
| C63 | -11.1685 | 1.9767  | -2.0129 |
| C64 | -10.7801 | 0.6767  | -1.7885 |
| C65 | -9.4646  | 0.2693  | -2.1021 |
| C66 | 2.841    | 7.7575  | 1.0026  |
| C67 | 3.3549   | 9.0368  | 0.6785  |
| C68 | 3.5263   | 9.9835  | 1.6584  |
| C69 | 3.1994   | 9.6883  | 3.0095  |
| C70 | 2.6827   | 8.3913  | 3.3437  |
| C71 | 8.7133   | -1.6252 | -4.8319 |
| C72 | 9.6956   | -1.8519 | -5.7722 |
| C73 | 11.0495  | -1.969  | -5.3818 |
| C74 | 11.3916  | -1.8518 | -4.0536 |
| C75 | 0.6159   | -8.0682 | 5.6655  |
| C76 | 1.3093   | -8.9816 | 4.9066  |
| C77 | 0.8942   | -9.2503 | 3.5811  |
| C78 | -0.2008  | -8.61   | 3.0446  |
| C79 | -8.025   | 3.5066  | -3.3748 |
| C80 | -8.4419  | 4.801   | -3.5923 |
| C81 | -9.7707  | 5.1891  | -3.2995 |
| C82 | -10.6533 | 4.2674  | -2.7871 |
| C83 | 3.3773   | 10.6508 | 4.0388  |
| C84 | 3.0694   | 10.3577 | 5.3481  |
| C85 | 2.5682   | 9.0788  | 5.6837  |
| C86 | 2.3802   | 8.123   | 4.7083  |
| H87 | 6.683    | -3.2877 | -0.5162 |
| H88 | 3.1132   | -1.786  | -2.3755 |
| H89 | 1.9618   | -3.937  | -1.922  |
| H90 | 5.5229   | -5.4535 | -0.0606 |
| H91 | 1.2762   | -7.5971 | -1.687  |
| H92 | -1.1273  | -7.6851 | -0.9885 |
| H93 | -0.3796  | -4.6267 | 1.9323  |
| H94 | 2.0072   | -4.5322 | 1.2299  |
| H95 | 6.4338   | -0.233  | -3.4471 |
| H96 | 6.3036   | -1.9923 | -3.497  |

|       |          |         |         |
|-------|----------|---------|---------|
| H97   | -3.7508  | -7.244  | 1.9371  |
| H98   | -2.3278  | -8.1799 | 1.5001  |
| H99   | 11.8019  | -1.5695 | -1.4041 |
| H100  | 10.0576  | -1.1375 | 0.3043  |
| H101  | 7.6852   | -0.9424 | -0.3567 |
| H102  | -3.6482  | -5.5617 | 3.7252  |
| H103  | -2.8711  | -5.0742 | 6.0292  |
| H104  | -0.8847  | -6.2461 | 6.943   |
| H105  | -7.2691  | 2.1357  | 0.1194  |
| H106  | -3.9617  | 1.5071  | -2.5465 |
| H107  | -2.8715  | 3.5753  | -1.6959 |
| H108  | -6.1666  | 4.2129  | 0.9832  |
| H109  | -2.5563  | 3.1808  | 1.4368  |
| H110  | -0.1398  | 3.2443  | 1.9986  |
| H111  | 0.172    | 7.1693  | 0.2802  |
| H112  | -2.2613  | 7.104   | -0.2859 |
| H113  | -6.6262  | 1.2587  | -3.6615 |
| H114  | -7.2359  | -0.3701 | -3.3988 |
| H115  | 1.0435   | 6.1629  | 3.264   |
| H116  | 2.6798   | 5.5022  | 3.259   |
| H117  | -12.1817 | 2.2995  | -1.7855 |
| H118  | -11.4817 | -0.0459 | -1.3813 |
| H119  | -9.1749  | -0.7654 | -1.9381 |
| H120  | 2.7203   | 7.0256  | 0.2106  |
| H121  | 3.6134   | 9.2589  | -0.353  |
| H122  | 3.9183   | 10.9686 | 1.4172  |
| H123  | 7.6839   | -1.5321 | -5.1627 |
| H124  | 9.428    | -1.9396 | -6.8217 |
| H125  | 11.8153  | -2.1483 | -6.1314 |
| H126  | 12.4304  | -1.9362 | -3.743  |
| H127  | 0.9263   | -7.8483 | 6.6843  |
| H128  | 2.1744   | -9.4942 | 5.3181  |
| H129  | 1.4476   | -9.9653 | 2.9784  |
| H130  | -0.4774  | -8.8249 | 2.0186  |
| H131  | -6.9944  | 3.2476  | -3.5902 |
| H132  | -7.7424  | 5.5322  | -3.9882 |
| H133  | -10.0875 | 6.2132  | -3.4769 |
| H134  | -11.6759 | 4.554   | -2.5528 |
| H135  | 3.7676   | 11.6298 | 3.7708  |
| H136  | 3.2124   | 11.1037 | 6.125   |
| H137  | 2.3312   | 8.8477  | 6.7187  |
| H138  | 2.0021   | 7.1475  | 4.9966  |
| Zn139 | -4.7999  | -3.1423 | -0.3846 |
| Zn140 | 4.1095   | 2.3621  | -0.1106 |

**Table S11** Coordinates for optimized geometry of binuclear Cd<sup>II</sup>dithiocarbamate complex **6**.

| Atom<br>Type | Coordinates (Angstroms) |         |         |
|--------------|-------------------------|---------|---------|
|              | X                       | Y       | Z       |
| C1           | -3.5615                 | -5.0663 | -1.282  |
| C2           | -3.7424                 | -3.7921 | -0.7297 |
| C3           | -2.8221                 | -2.7859 | -1.0403 |
| C4           | -1.7618                 | -3.028  | -1.9068 |
| C5           | -1.5622                 | -4.3142 | -2.4204 |
| C6           | -2.4704                 | -5.3302 | -2.1083 |
| O7           | -0.5369                 | -4.6725 | -3.2715 |
| C8           | 0.5561                  | -3.864  | -3.5051 |
| C9           | 1.0556                  | -3.862  | -4.8098 |
| C10          | 2.1528                  | -3.0634 | -5.131  |
| C11          | 2.7359                  | -2.2465 | -4.1594 |
| C12          | 2.2624                  | -2.2904 | -2.8455 |

|     |         |         |         |
|-----|---------|---------|---------|
| C13 | 1.1992  | -3.1211 | -2.5076 |
| N14 | -4.7916 | -3.5622 | 0.238   |
| N15 | 3.7377  | -1.2803 | -4.5513 |
| C16 | -4.8925 | -4.5697 | 1.3156  |
| C17 | -6.0104 | -5.5877 | 1.1472  |
| C18 | 3.1916  | -0.1056 | -5.301  |
| C19 | 2.3975  | 0.8354  | -4.4055 |
| C20 | -5.5507 | -2.4347 | 0.2724  |
| C21 | 5.0099  | -1.3319 | -4.096  |
| S22 | -6.5011 | -2.0778 | 1.6962  |
| S23 | -5.5885 | -1.3436 | -1.0844 |
| S24 | 5.4837  | -2.6121 | -3.0114 |
| S25 | 6.1782  | -0.1154 | -4.5663 |
| C26 | -6.1478 | -6.6194 | 2.1348  |
| C27 | -7.1951 | -7.5889 | 1.9846  |
| C28 | -8.0715 | -7.5032 | 0.8689  |
| C29 | -7.9198 | -6.5033 | -0.0599 |
| C30 | -6.8856 | -5.5459 | 0.082   |
| C31 | 3.1038  | 1.749   | -3.6407 |
| C32 | 2.4541  | 2.6362  | -2.7531 |
| C33 | 1.0841  | 2.6086  | -2.6338 |
| C34 | 0.3092  | 1.7012  | -3.4035 |
| C35 | 0.964   | 0.7987  | -4.313  |
| C36 | 3.8721  | 1.4345  | 0.984   |
| C37 | 4.9076  | 1.3691  | 1.9225  |
| C38 | 4.8101  | 2.1354  | 3.0905  |
| C39 | 3.6894  | 2.9303  | 3.3214  |
| C40 | 2.6631  | 2.9956  | 2.3745  |
| C41 | 2.7741  | 2.2657  | 1.1856  |
| O42 | 1.6329  | 3.8579  | 2.6814  |
| C43 | 0.351   | 3.766   | 2.1881  |
| C44 | -0.415  | 4.9298  | 2.3122  |
| C45 | -1.745  | 4.9453  | 1.8998  |
| C46 | -2.3235 | 3.8046  | 1.3294  |
| C47 | -1.5472 | 2.649   | 1.1945  |
| C48 | -0.2313 | 2.6127  | 1.6492  |
| N49 | 6.0065  | 0.4445  | 1.7555  |
| N50 | -3.6658 | 3.8634  | 0.7957  |
| C51 | 6.28    | -0.4337 | 2.9131  |
| C52 | 7.4607  | -0.0176 | 3.7777  |
| C53 | -3.9431 | 5.0008  | -0.107  |
| C54 | -4.6822 | 6.1699  | 0.5289  |
| C55 | 6.673   | 0.2733  | 0.582   |
| C56 | -4.5998 | 2.898   | 1.0095  |
| S57 | 7.7191  | -1.1145 | 0.3791  |
| S58 | 6.497   | 1.4159  | -0.715  |
| S59 | -4.3449 | 1.6713  | 2.2136  |
| S60 | -6.0735 | 2.906   | 0.0683  |
| C61 | 7.766   | -0.8018 | 4.9396  |
| C62 | 8.8741  | -0.4156 | 5.7656  |
| C63 | 9.643   | 0.7269  | 5.4139  |
| C64 | 9.3311  | 1.4577  | 4.294   |
| C65 | 8.2367  | 1.0823  | 3.4769  |
| C66 | -5.1285 | 6.1314  | 1.8332  |
| C67 | -5.8119 | 7.2292  | 2.4111  |
| C68 | -6.0447 | 8.3656  | 1.6762  |
| C69 | -5.6068 | 8.453   | 0.3269  |
| C70 | -4.9178 | 7.3418  | -0.2647 |
| C71 | -5.2894 | -6.7298 | 3.2643  |
| C72 | -5.4527 | -7.7382 | 4.19    |
| C73 | -6.4845 | -8.6927 | 4.0365  |
| C74 | -7.3347 | -8.6151 | 2.9565  |

|      |         |         |         |
|------|---------|---------|---------|
| C75  | -1.1073 | 1.6708  | -3.2841 |
| C76  | -1.8664 | 0.7984  | -4.0291 |
| C77  | -1.2302 | -0.0817 | -4.9362 |
| C78  | 0.1408  | -0.0799 | -5.0736 |
| C79  | 7.0184  | -1.9524 | 5.3165  |
| C80  | 7.3432  | -2.6782 | 6.4427  |
| C81  | 8.4344  | -2.2925 | 7.2549  |
| C82  | 9.1806  | -1.1852 | 6.9193  |
| C83  | -5.838  | 9.6191  | -0.4504 |
| C84  | -5.415  | 9.6979  | -1.7581 |
| C85  | -4.74   | 8.6037  | -2.3467 |
| C86  | -4.4984 | 7.4577  | -1.6195 |
| H87  | -4.2671 | -5.8602 | -1.0597 |
| H88  | -2.9349 | -1.7965 | -0.6174 |
| H89  | -1.1002 | -2.2126 | -2.1681 |
| H90  | -2.3174 | -6.3199 | -2.526  |
| H91  | 0.5703  | -4.477  | -5.5605 |
| H92  | 2.5398  | -3.0557 | -6.146  |
| H93  | 2.7315  | -1.6775 | -2.0852 |
| H94  | 0.857   | -3.1682 | -1.4808 |
| H95  | -3.9243 | -5.0765 | 1.3548  |
| H96  | -5.0182 | -4.0304 | 2.2599  |
| H97  | 4.0406  | 0.4194  | -5.7361 |
| H98  | 2.5897  | -0.499  | -6.1212 |
| H99  | -8.863  | -8.2415 | 0.7662  |
| H100 | -8.5917 | -6.4355 | -0.9108 |
| H101 | -6.79   | -4.7639 | -0.6647 |
| H102 | 4.1859  | 1.7801  | -3.7217 |
| H103 | 3.0466  | 3.3368  | -2.1717 |
| H104 | 0.5718  | 3.286   | -1.9541 |
| H105 | 3.9236  | 0.8504  | 0.0747  |
| H106 | 5.6053  | 2.106   | 3.828   |
| H107 | 3.6023  | 3.5157  | 4.2308  |
| H108 | 2.0202  | 2.3325  | 0.4118  |
| H109 | 0.0416  | 5.8131  | 2.7464  |
| H110 | -2.3308 | 5.8508  | 2.0176  |
| H111 | -1.974  | 1.7586  | 0.7506  |
| H112 | 0.324   | 1.6866  | 1.5803  |
| H113 | 5.364   | -0.4507 | 3.5102  |
| H114 | 6.4385  | -1.446  | 2.5276  |
| H115 | -2.9735 | 5.3335  | -0.4883 |
| H116 | -4.5148 | 4.6167  | -0.958  |
| H117 | 10.4815 | 1.0093  | 6.0459  |
| H118 | 9.921   | 2.3286  | 4.0227  |
| H119 | 8.0143  | 1.6745  | 2.5948  |
| H120 | -4.9593 | 5.244   | 2.4346  |
| H121 | -6.1502 | 7.1603  | 3.4411  |
| H122 | -6.5676 | 9.2127  | 2.1134  |
| H123 | -4.4916 | -6.0085 | 3.4104  |
| H124 | -4.7852 | -7.7994 | 5.0452  |
| H125 | -6.6041 | -9.4831 | 4.7724  |
| H126 | -8.1328 | -9.3431 | 2.8308  |
| H127 | -1.5814 | 2.3558  | -2.5848 |
| H128 | -2.9475 | 0.7816  | -3.9253 |
| H129 | -1.8294 | -0.7679 | -5.5281 |
| H130 | 0.5936  | -0.7781 | -5.7673 |
| H131 | 6.1785  | -2.2754 | 4.7095  |
| H132 | 6.7578  | -3.5545 | 6.7077  |
| H133 | 8.6814  | -2.872  | 8.1401  |
| H134 | 10.023  | -0.8816 | 7.5364  |
| H135 | -6.3606 | 10.454  | 0.0106  |
| H136 | -5.5995 | 10.5963 | -2.3406 |

|       |         |         |         |
|-------|---------|---------|---------|
| H137  | -4.411  | 8.6666  | -3.3804 |
| H138  | -3.9833 | 6.6314  | -2.0988 |
| Cd139 | -6.1877 | 0.386   | 0.8186  |
| Cd140 | 7.1196  | -0.7234 | -2.1622 |

## 2. Molecular Electrostatic Potential (MESP)

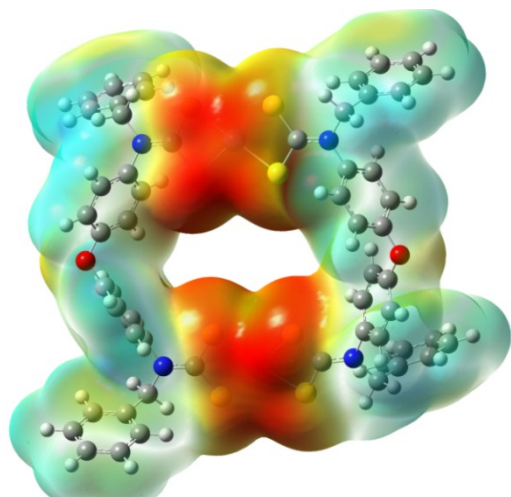

(a)

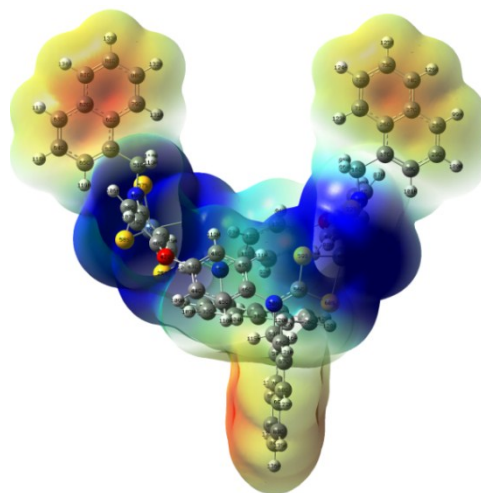

(d)

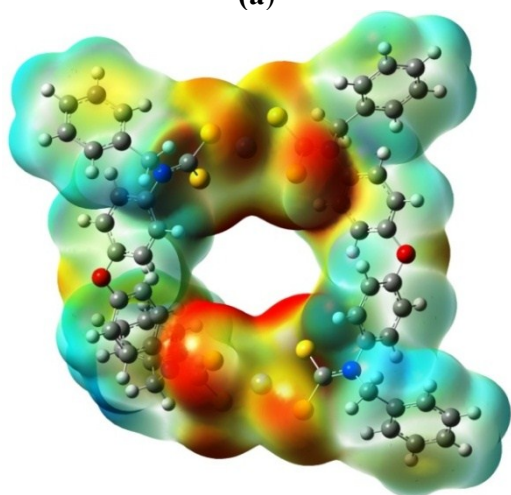

(b)

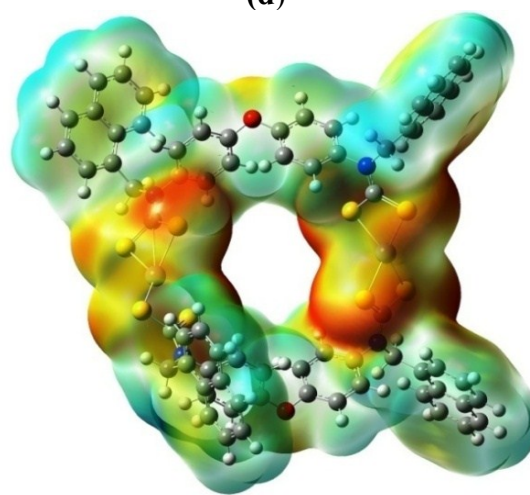

(e)

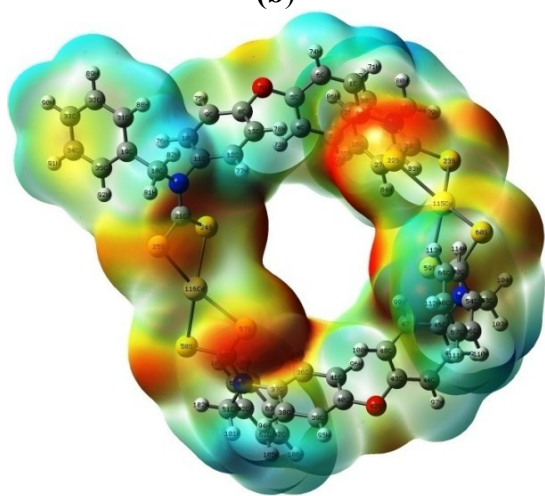

(c)

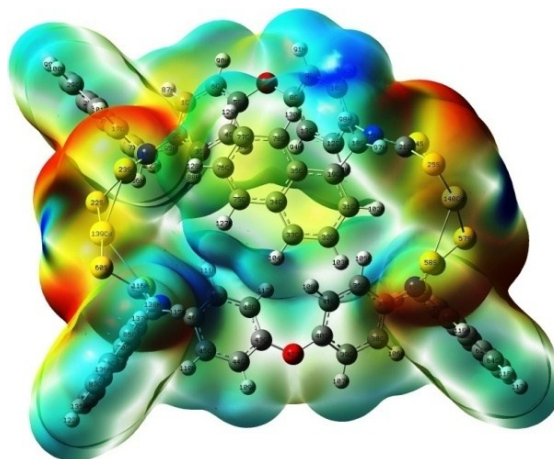

(f)

**Fig. S32** Graphical representation of electron density from total SCF density (isoval= 0.0004; mapped with ESP, Red and blue colour represents localization of negative and positive potential respectively) for compounds **1** (a); **2** (b); **3** (c); **4** (d); **5** (e) and **6** (f).

### 3. Frontier Molecular Orbitals Analysis

For ligand precursors **L**<sup>1</sup>-**L**<sup>2</sup>,  $\pi$ -system of phenyl rings adjacent to ethereal oxygen contribute for HOMO, while LUMO is predominantly located on one of peripheral aromatic substituents. The HOMO and LUMO for **1** is localized over the various N-benzyl substituents whereas for complex **2** and **3**, the HOMO is predominantly delocalized over  $\pi$ -orbitals of one of the ligand framework excluding N-substituents, whereas coordinated dithiocarbamate moieties largely contributed for LUMO. However, in compound **4** all four 1-naphthylmethyl moieties are equally contributing to the HOMO whereas LUMO is delocalized over  $\pi$ -orbitals of ethereal phenyl rings and one of the coordinated dithiocarbamate functionality along with 1-naphthylmethyl moiety which is oriented towards side of the bowl shaped molecular framework. For complex **5**, HOMO is situated over nearly the whole molecule and LUMO is mainly localized at the only one of the 1-naphthylmethyl group connected to dithiocarbamate moiety; but for complex **6**, HOMO is delocalized over molecular fragment except 1-naphthylmethyl moieties and LUMO is mainly located around one of the cadmium centre. Furthermore, it appeared that HOMO-LUMO energy differences for the Ni<sup>II</sup>dithiocarbamates **1** (3.6774 eV) and **4** (3.4649 eV) are significantly lower compared to their Zn<sup>II</sup> and Cd<sup>II</sup> analogues. Expectedly, the significant decrease in the HOMO-LUMO energy gap for compounds **1-3** compared to their ligand precursor **L**<sup>1</sup> (4.5814 eV) is observed probably due to rigidity and extended conjugation conferred by coordinated dithiocarbamate ligand in molecular framework. The bulky 1-naphthylmethyl substituents lead to distortion in the molecular architecture affecting the conjugation could be the reason for increased HOMO-LUMO energy gap for compounds **5-6** compared to **L**<sup>2</sup>. The study depicted that extended conjugation decreases the HOMO-LUMO energy gap as it get remarkably decrease after variation of 1-naphthyl moiety instead of phenyl ring. Interestingly, the HOMO-LUMO energy gap for bimetallic dithiocarbamate complexes **1-6** is found in range 3.4649-4.7118 eV; which reveals the possible semiconducting properties of these compounds. In actual fact, the HOMO-LUMO energy gaps obtained by computational investigation are significantly higher than the UV-visible transmittance results probably due to presence of extensive noncovalent interactions in solid state. Thus, it adds merits to increase the potential applicability of this class of compounds towards semiconducting materials. To the other hand, the computational investigations could be authenticated by the comparable experimental results. The HOMO-LUMO gaps obtained by computational study are clearly supported by the experimental UV-visible absorption data showing the comparable  $\lambda_{\text{max}}$  values for complexes **1-6** respectively.

### References:

1. E. A. Davis and N. F. Mott, *Phil. Mag.*, 1970, 22, 903.
2. (a) M. H. Habibi and N. Talebian, *Acta Chim. Slov.*, 2005, 52, 53. (b) J. Tauc, *Mater. Res. Bull.*, 1970, 5, 721.
3. (a) R. Sharma and N. K. Kaushik, *J. Therm. Anal. Calorim.*, 2004, 78, 953. (b) B. F. Ali, W. S. A.-Akramawi, K. H. A.-Obaidi and A. H. A.-Karboli, *Thermochim. Acta*, 2004, 419, 39.



4. A. A. Memon, M. Afzaal, M. A. Malik, C. Q. Nguyen, P. O'Brien and J. Raftery, *Dalton Trans.*, 2006, 4499.
5. D. C. Onwudiwe and P. A. Ajibade, *Int. J. Mol. Sci.*, 2011, 12,1964.
